# Supplementary material for: Molecular insights into the activation mechanism of GPR156 in maintaining auditory function
Source: PubMed Central journal article supplement — Nat Commun. 2024 Dec 5;15:10601. doi: 10.1038/s41467-024-54681-5 (PMC11621567; doi:10.1038/s41467-024-54681-5), 2024-12-05
Supplement: 41467_2024_54681_MOESM1_ESM.pdf [file 41467_2024_54681_MOESM1_ESM.pdf]

## **Supplementary Information**

### **Molecular insights into the activation mechanism of GPR156 in maintaining auditory function**

Xiangyu Ma, Li-Nan Chen, Menghui Liao, Liyan Zhang, Kun Xi, Jiamin Guo, Cansong Shen, Dan-Dan Shen, Pengjun Cai, Qingya Shen, Jieyu Qi, Huibing Zhang, Shao-Kun Zang, Ying-Jun Dong, Luwei Miao, Jiao Qin, Su-Yu Ji, Yue Li, Jianfeng Liu\*, Chunyou Mao\*, Yan Zhang\*, Renjie Chai\*

\*Corresponding: [jfliu@mail.hust.edu.cn](mailto:jfliu@mail.hust.edu.cn) (J.L.); [maochunyou@zju.edu.cn](mailto:maochunyou@zju.edu.cn) (C.M.); [zhang\\_yan@zju.edu.cn](mailto:zhang_yan@zju.edu.cn) (Y.Z.); [renjie@seu.edu.cn](mailto:renjie@seu.edu.cn) (R.C.)

#### **The PDF file includes:**

Supplementary Figures 1-18

Supplementary Tables 1-6

Unprocessed gels and western blots for Supplementary Fig. 2d and e

#### **Other Supplementary Information for this manuscript include the following:**

Supplementary Data 1

Source Data

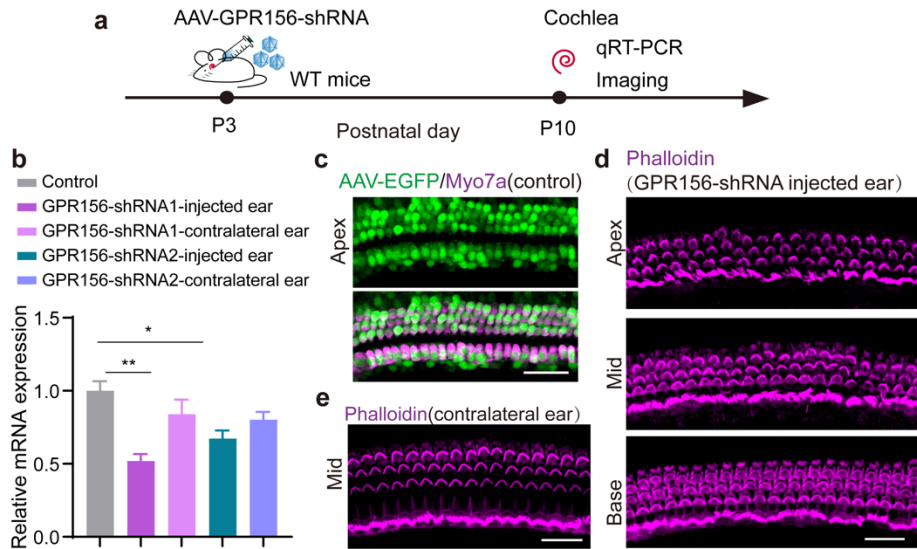

**Supplementary Fig. 1 | Knockdown of GPR156 causes a slight deflection of the stereocilia in neonatal mice.**

**a**, The experimental design. AAV dose:  $6 \times 10^{10}$  GC/ear. **b**, The transcriptional expression levels of GPR156 in the apical turn of the GPR156-shRNA-transduced cochlea from 3 independent experiments. \* $P < 0.05$ , \*\* $P < 0.01$ , were calculated by two-tailed unpaired t-test compared to WT mice (mean  $\pm$  SD (bars), Control vs AAV-GPR156-shRNA1-injected ear:  $P=0.04946$ ; Control vs AAV-GPR156-shRNA1-contralateral ear:  $P=0.255125$ ; Control vs AAV-GPR156-shRNA2-injected ear:  $P=0.018376$ ; Control vs AAV-GPR156-shRNA2-contralateral ear:  $P=0.077506$ ). Source data are provided as a Source Data file. **c**, Representative images of the control virus infecting inner ear HCs in P3 mice from 6 independent experiments. Scale bar, 40  $\mu\text{m}$ . **d**, Representative confocal images of the stereocilia in the GPR156-shRNA-injected cochlea from 5 independent experiments. Scale bar, 80  $\mu\text{m}$ . **e**, The representative confocal image of stereocilia in the GPR156-shRNA contralateral cochlea from 5 independent experiments. Scale bar, 80  $\mu\text{m}$ .

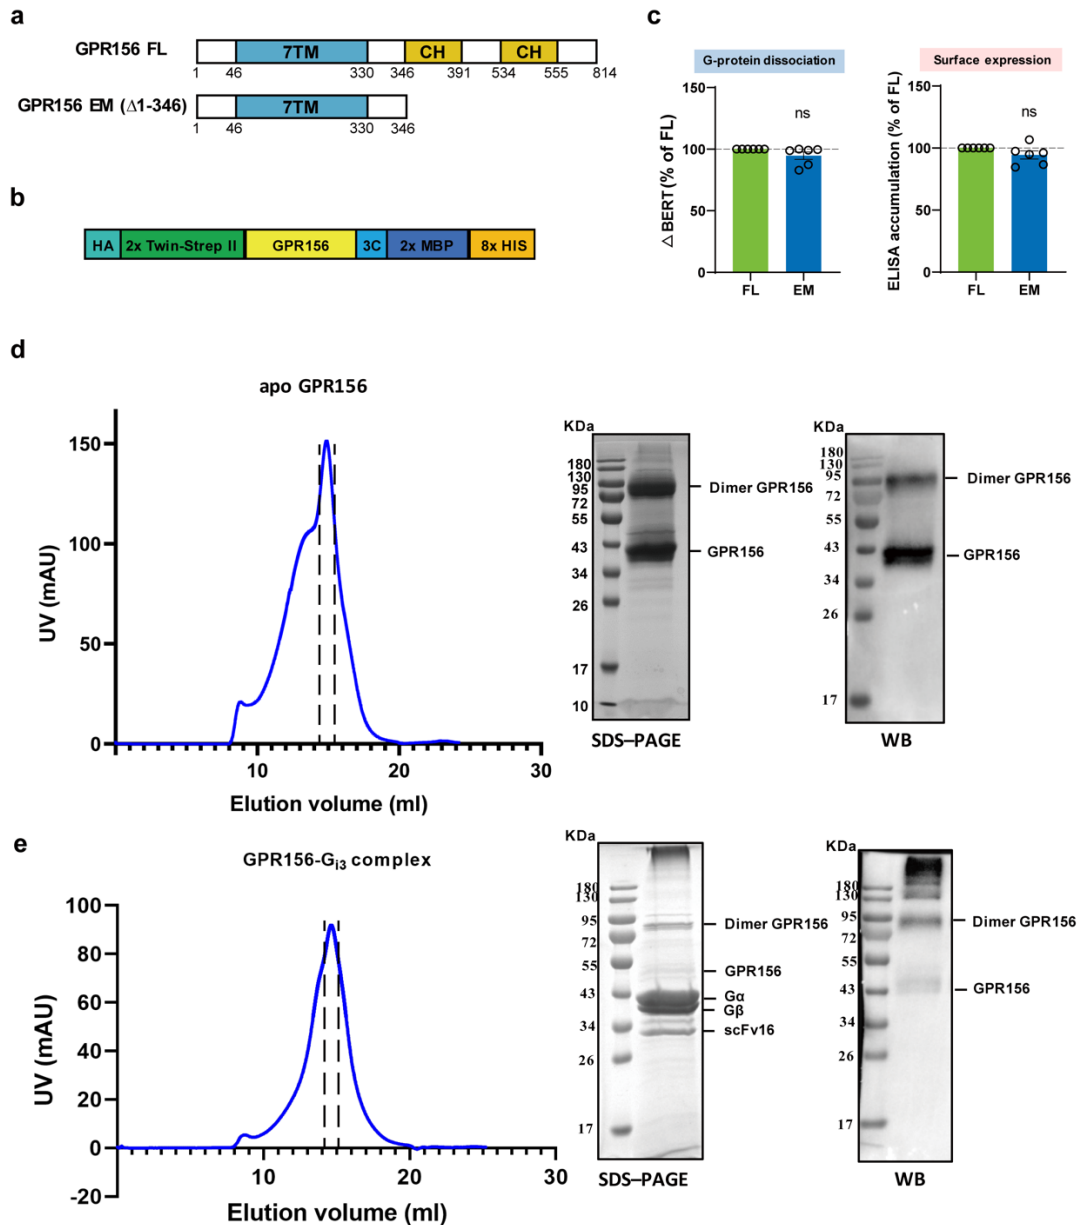

**Supplementary Fig. 2 | Optimization and purification of human apo GPR156 and the GPR156–G<sub>i3</sub> complex.**

**a**, Diagram of the primary structure (FL) of GPR156 domains versus the purification construct (EM). CH: cytoplasmic helices. **b**, Detailed diagram of the purification construct (EM). **c**, Basal activity (left panel) and surface expression (right panel) of the FL and EM constructs of GPR156, as measured by BRET-based assay (from left to right  $n = 6, 6$ ; EM vs FL,  $P=0.1131$ ) and ELISA assay (from left to right  $n = 6, 6$ ; EM vs FL,  $P=0.1173$ ), respectively. Data are presented as a percentage of WT activity and are shown as the mean  $\pm$  SEM (bars) from at least six independent experiments performed in technical triplicate with individual data points shown (dots). ns (not significant) =  $P > 0.05$ , \* $P < 0.05$ , \*\* $P < 0.01$ , \*\*\* $P < 0.001$ , \*\*\*\* $P < 0.0001$  by two-tailed unpaired t-test compared to WT. **Supplementary Table 1** provides detailed information. Source data are provided as a Source Data file. **d**, **e**, Size-exclusion

chromatography profile (left panel), SDS-PAGE gel (middle panel), and western blot (right panel) of the purified apo GPR156 (**d**) and GPR156-G<sub>i3</sub> complex (**e**). These experiments were repeated three times with similar results. Source data are provided as a Source Data file.

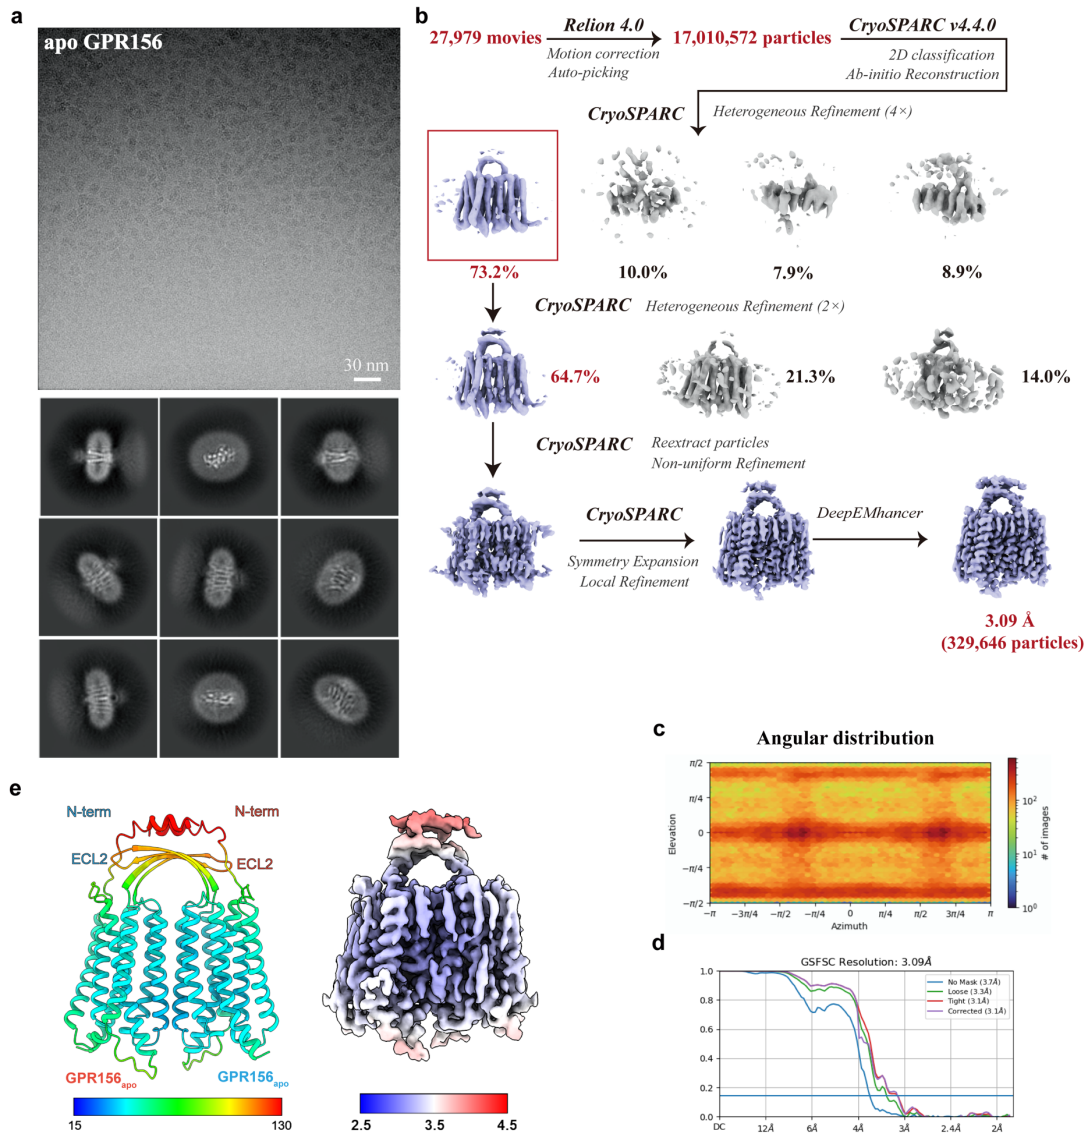

### Supplementary Fig. 3 | Workflow of the cryo-EM data processing of apo GPR156.

**a**, Representative cryo-EM micrograph (top panel) and 2D averages (bottom panel) for apo GPR156. **b**, Cryo-EM data processing workflow for apo GPR156. **c**, Euler angle orientation distribution plots, from CryoSPARC, for the final map of apo GPR156. **d**, No mask fourier shell correlation (FSC) (blue) curve, Corrected (purple), Loose (green), and Tight (red) validation curve of apo GPR156. **e**, Average B-factors plotted on the structure (left panel) and Cryo-EM map colored by local resolution (right panel) of apo GPR156. Blue to red colors indicate lower to higher B-factors and higher to lower map resolution, respectively.

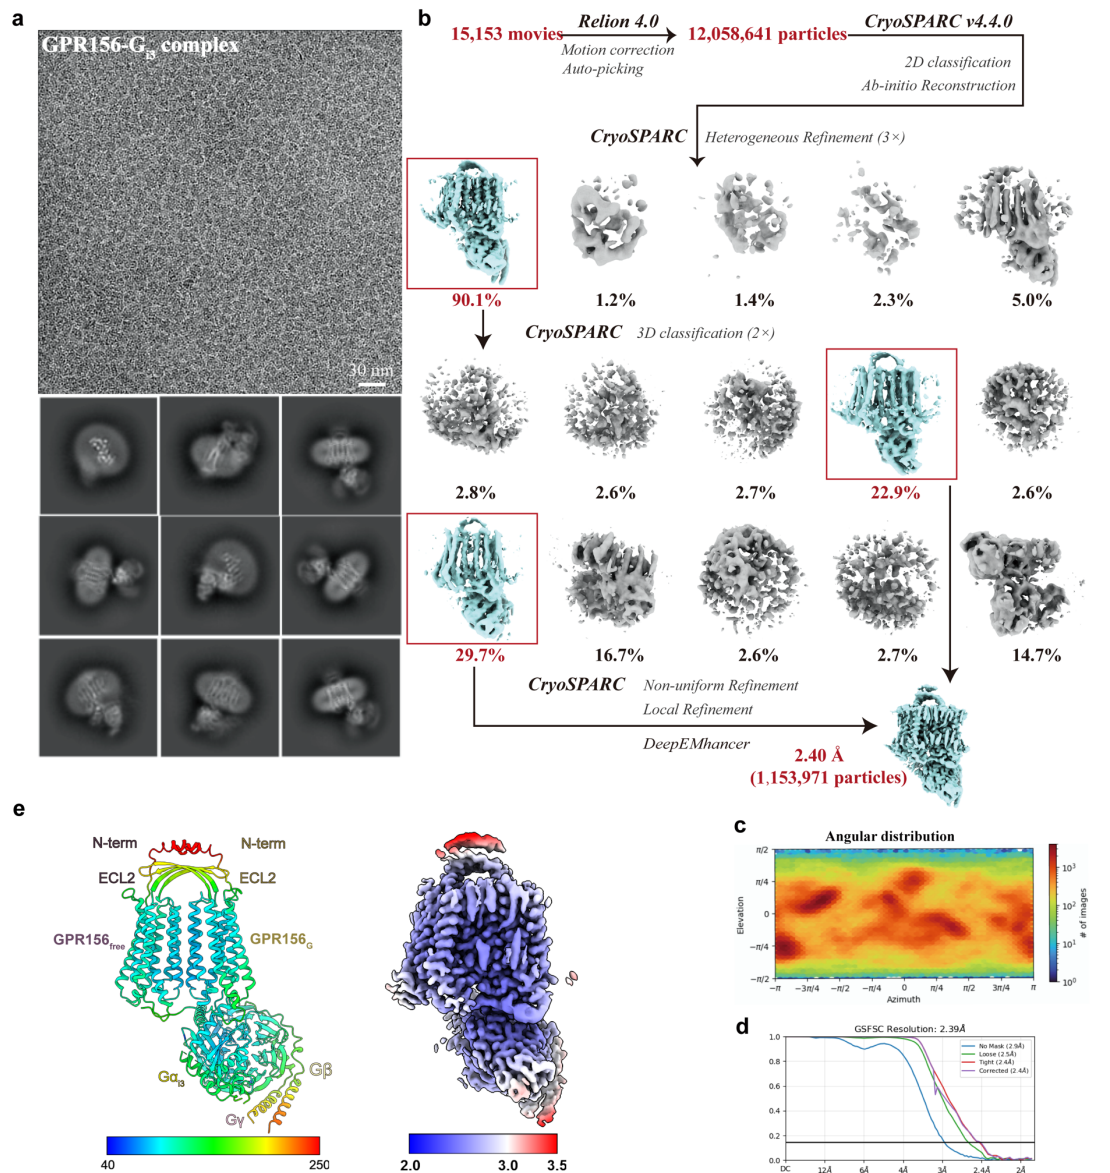

**Supplementary Fig. 4 | Workflow of the cryo-EM data processing of the GPR156–G<sub>i3</sub> complex.**

**a**, Representative cryo-EM micrograph (top panel) and 2D averages (bottom panel) for the GPR156–G<sub>i3</sub> complex. **b**, Cryo-EM data processing workflow for the GPR156–G<sub>i3</sub> complex. **c**, Euler angle orientation distribution plots, from CryoSPARC, for the final map of the GPR156–G<sub>i3</sub> complex. **d**, No mask fourier shell correlation (FSC) (blue) curve, Corrected (purple), Loose (green), and Tight (red) validation curve of the GPR156–G<sub>i3</sub> complex. **e**, Average B-factors plotted on the structure (left panel) and Cryo-EM map colored by local resolution (right panel) of the GPR156–G<sub>i3</sub> complex. Blue to red colors indicate lower to higher B-factors and higher to lower map resolution, respectively.

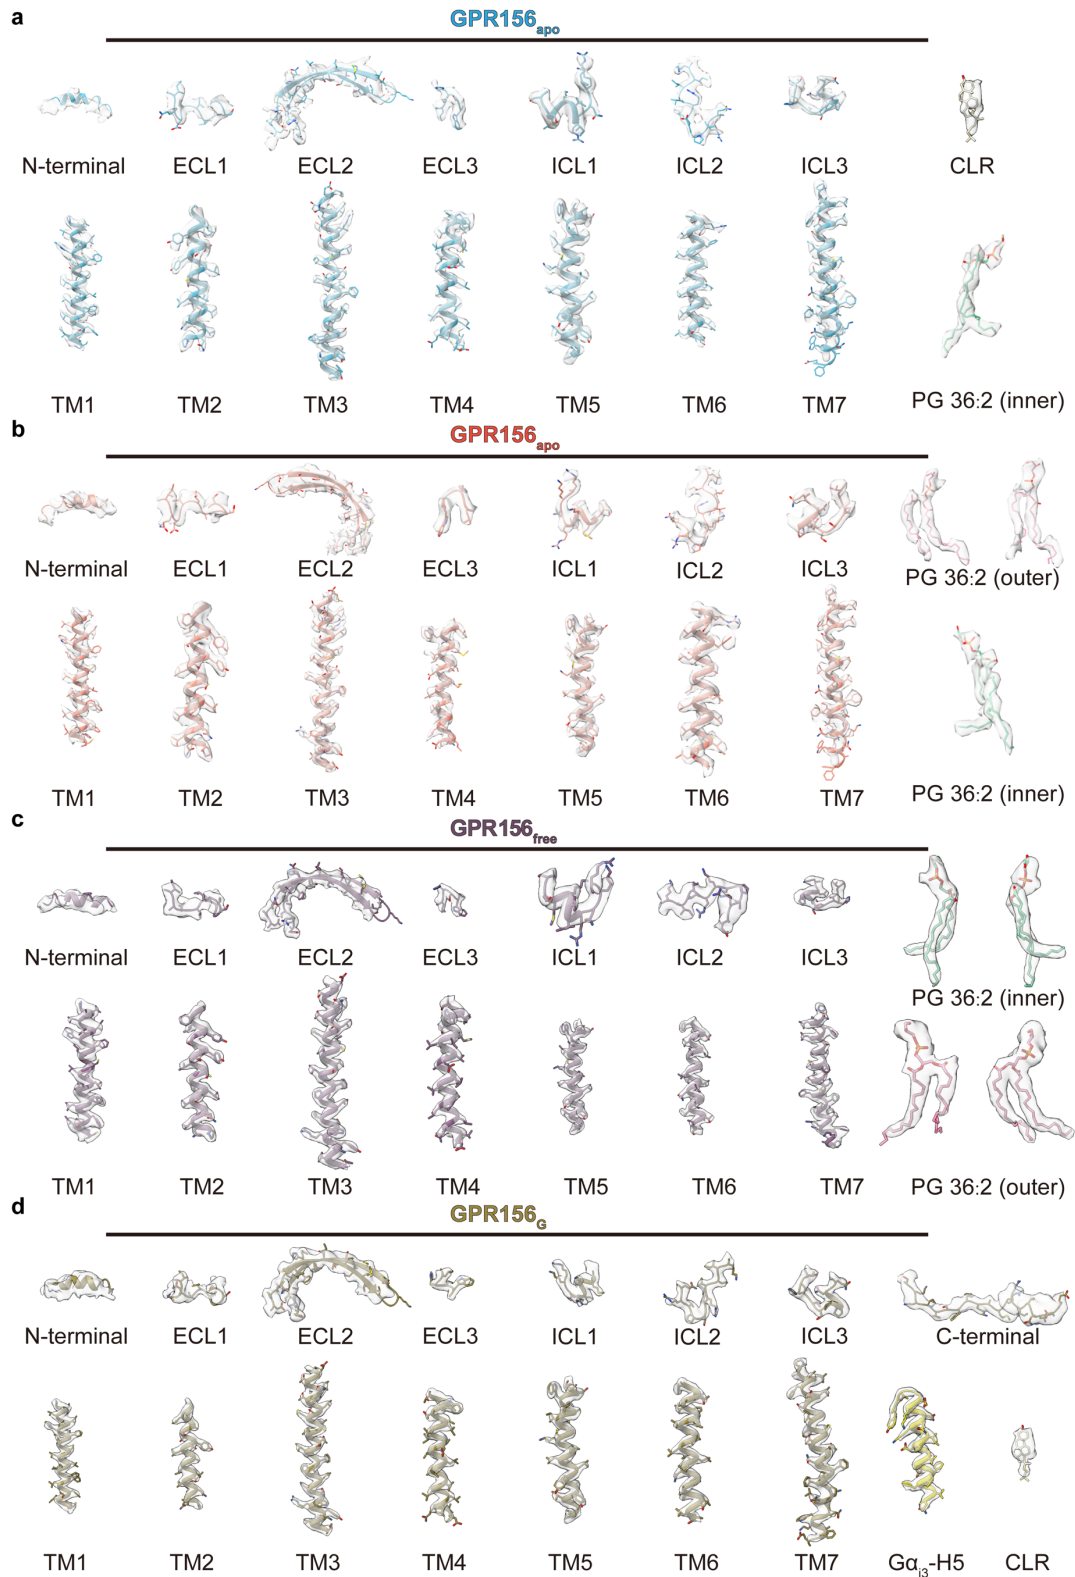

**Supplementary Fig. 5 | Structural models of apo GPR156 and the GPR156–G<sub>i3</sub> complex align with the cryo-EM maps.**

**a, b**, Cryo-EM density and the fitted atomic model for two protomers of apo GRP156, including the N-terminus, transmembrane helices, ECLs, ICLs, CLR, and PG 36:2 inside and outside TMD. **c, d**, Cryo-EM density and the fitted atomic model of the GPR156–G<sub>i3</sub> complex, including N-terminus, transmembrane helices, ECLs, ICLs,

PG 36:2 of the GPR156 G-free subunit (c), N-terminus, transmembrane helices, ECLs, ICLs, CLR, PG 36:2, C-terminus of the GPR156 G-bound subunit, and the  $\alpha 5$  helix of  $G\alpha_{i3}$  (d).



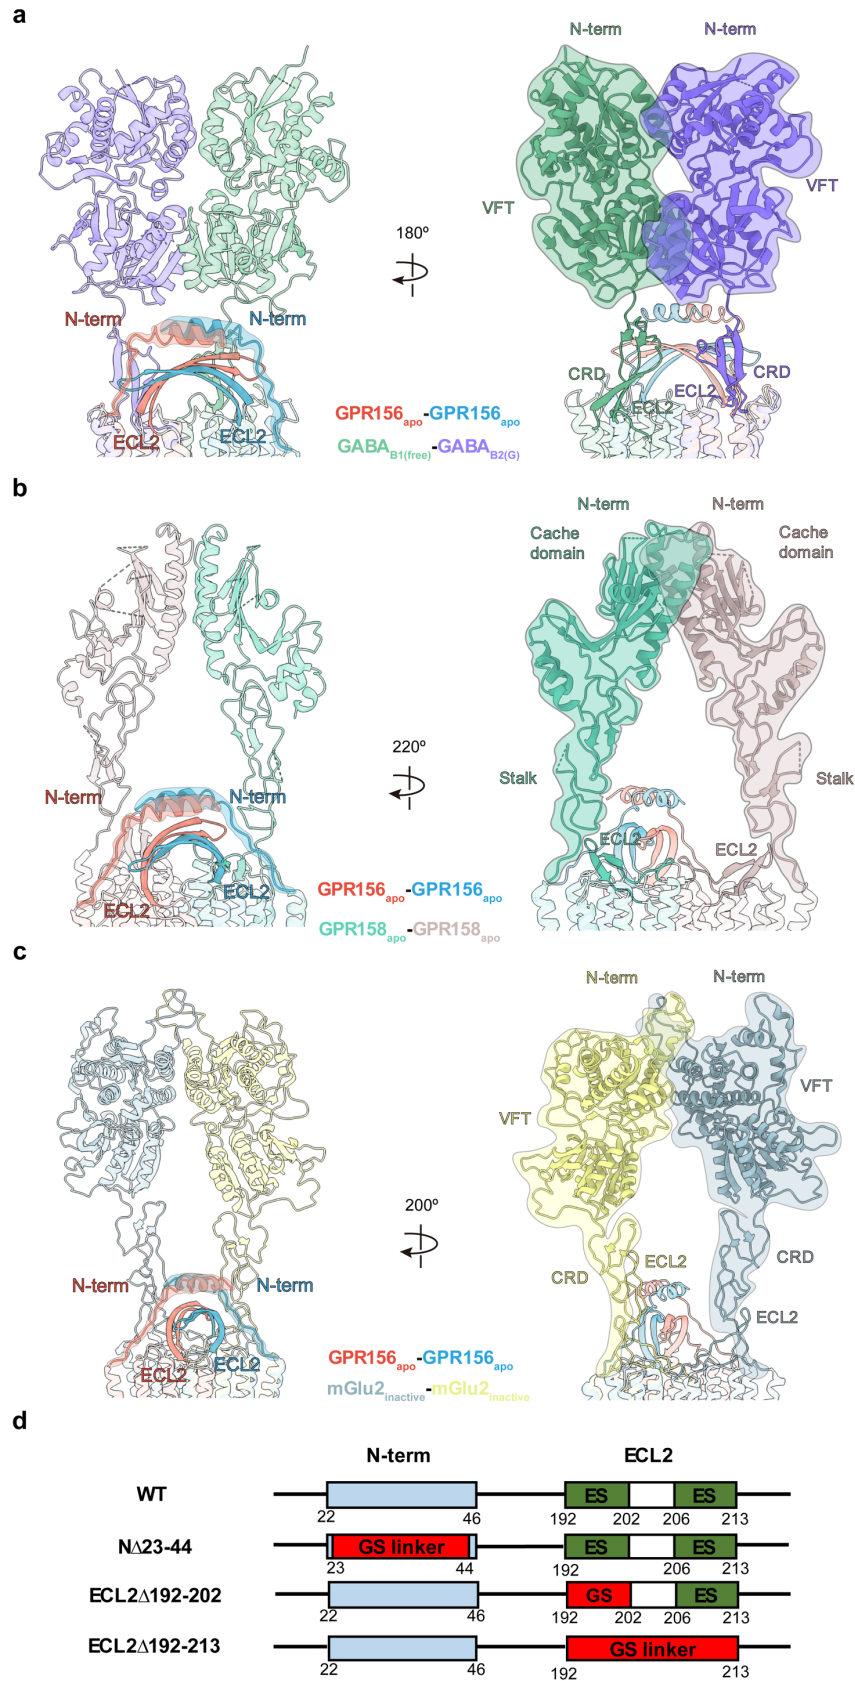

Supplementary Fig. 6 | Comparison of the GPR156 N-terminus and ECL2 with other class C GPCRs.

**a-c**, Structural comparisons of GPR156<sub>apo</sub>–GPR156<sub>apo</sub> with GABA<sub>B1(free)</sub>–GABA<sub>B2(G)</sub> (PDB code: 7EB2) (**a**), GPR158<sub>apo</sub>–GPR158<sub>apo</sub> (PDB code: 7EWL) (**b**), and mGlu2<sub>inactive</sub>–mGlu2<sub>inactive</sub> (PDB code: 7EPA) (**c**). **d**, Diagram of the WT GPR156 N-terminus and ECL2 versus the mutant constructs substituted with a GS link (NΔ23–44, ECL2Δ192–213, ECL2Δ192–202). GS link: A linker composed of glycine and serine. ES: β-strand.

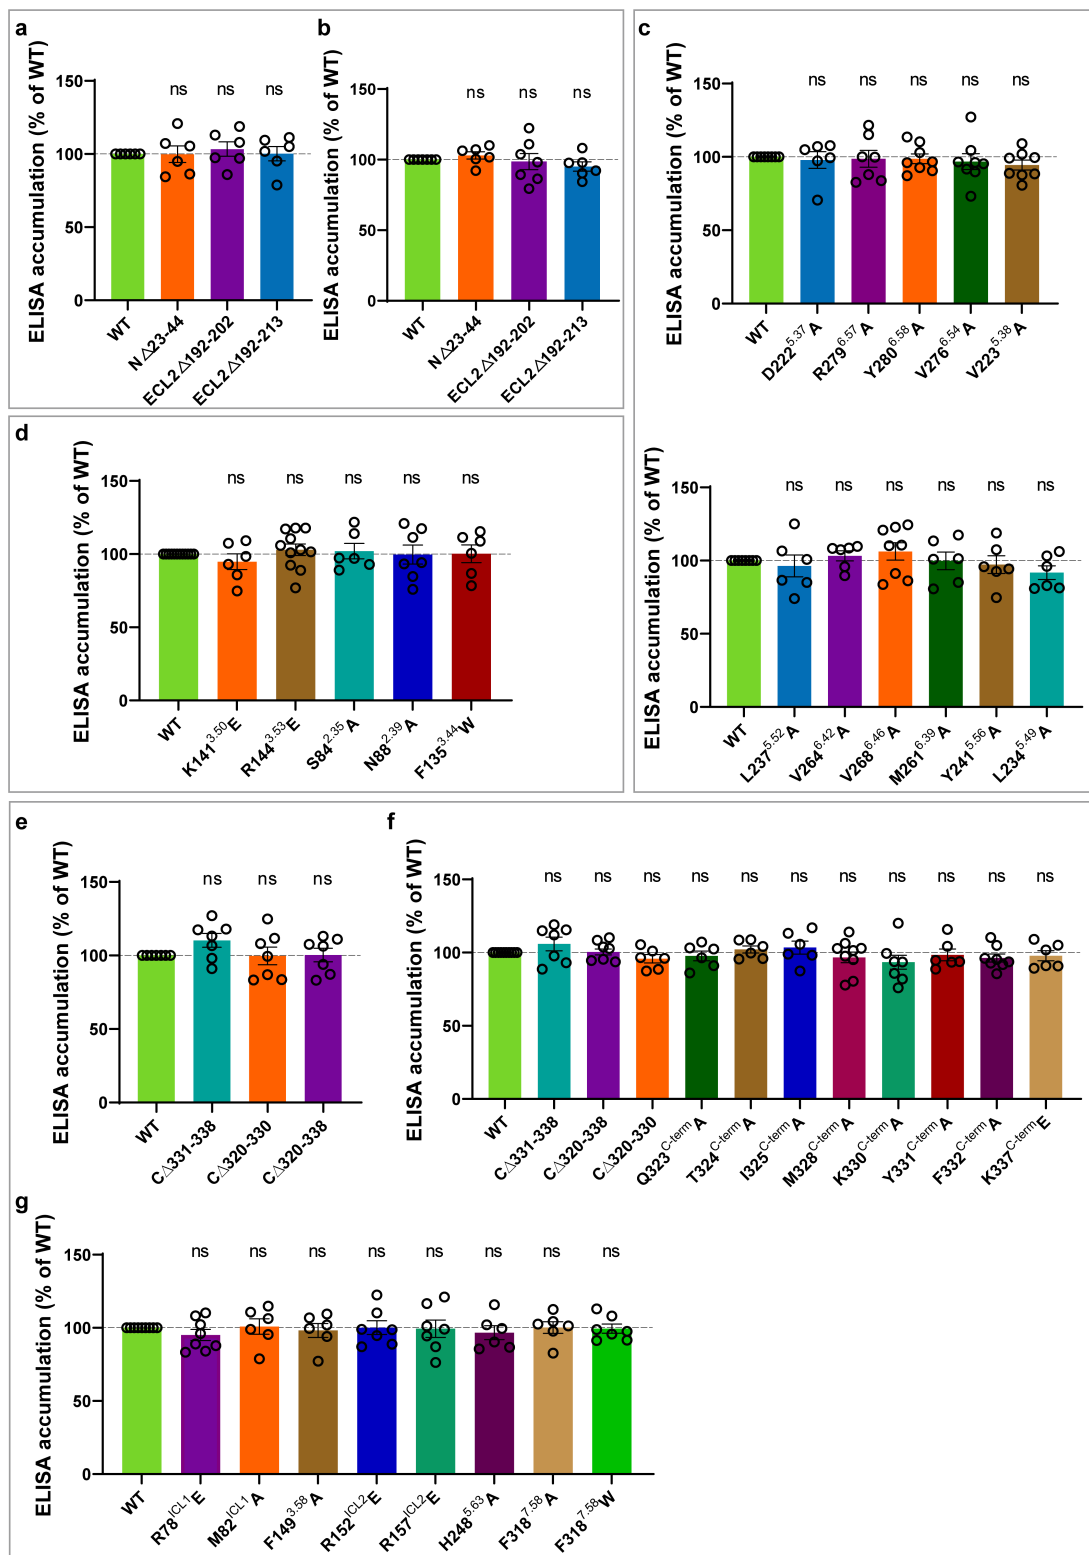

**Supplementary Fig. 7 | Surface expression profiles of GPR156 mutants, related to Figs. 3, 4, 5, and 6.**

**a, b**, Surface expression of WT and three constructs with mutations in the N-terminus and ECL2 of GPR156 in the BRET-based assay (**a**) (from left to right  $n = 6, 6, 6$ ; N $\Delta$ 23-44 vs WT:  $P = 0.9823$ ;  $\Delta$ 192-202 vs WT:  $P = 0.5129$ ;  $\Delta$ 192-213 vs WT:

$P=0.9619$ ) and NanoBiT-based assay (**b**) (from left to right  $n=6, 7, 6$ ; N $\Delta$ 23-44 vs WT:  $P=0.2373$ ;  $\Delta$ 192-202 vs WT:  $P=0.8155$ ;  $\Delta$ 192-213 vs WT:  $P=0.1402$ ), related to **Fig. 3d, e**, respectively. **c**, Surface expression of WT and mutant constructs with mutations in the transmembrane interface of GPR156 in the BRET-based assay (from left to right  $n=8, 6, 7, 8, 8, 8, 8, 6, 6, 8, 6, 6, 6$ ; D222<sup>5.37</sup>A vs WT:  $P=0.6641$ ; R279<sup>6.57</sup>A vs WT:  $P=0.8154$ ; Y280<sup>6.58</sup>A vs WT:  $P=0.7103$ ; V276<sup>6.54</sup>A vs WT:  $P=0.5593$ ; V223<sup>5.38</sup>A vs WT:  $P=0.1163$ ; L237<sup>5.52</sup>A vs WT:  $P=0.5763$ ; V264<sup>6.42</sup>A vs WT:  $P=0.2896$ ; V268<sup>6.46</sup>A vs WT:  $P=0.3137$ ; M261<sup>6.39</sup>A vs WT:  $P=0.9733$ ; Y241<sup>5.56</sup>A vs WT:  $P=0.6069$ ; L234<sup>5.49</sup>A vs WT:  $P=0.0625$ ), related to **Fig. 4e. d**, Surface expression of WT and mutant constructs with mutations in the TMD of GPR156 in the BRET-based assay (from left to right  $n=7, 7, 7, 7$ ; K141<sup>3.50</sup>E vs WT:  $P=0.1761$ ; R144<sup>3.53</sup>E vs WT:  $P=0.4340$ ; S84<sup>2.35</sup>A vs WT:  $P=0.5774$ ; N88<sup>2.39</sup>A vs WT:  $P=0.9523$ ; F135<sup>3.44</sup>W vs WT:  $P=0.9509$ ), related to **Fig. 5d. e**, Surface expression of WT and mutant versions of the C-terminal tail of GPR156 in the NanoBiT-based assay (from left to right  $n=12, 6, 11, 6, 7, 6$ ; C $\Delta$ 331-338 vs WT:  $P=0.0505$ ; C $\Delta$ 320-330 vs WT:  $P=0.9590$ ; C $\Delta$ 320-338 vs WT:  $P=0.9474$ ), related to **Fig. 6f. f**, Surface expression of WT and mutant versions of the C-terminal tail of GPR156 in the BRET-based assay (from left to right  $n=10, 7, 6, 7, 6, 6, 6, 9, 7, 6, 8, 6$ ; C $\Delta$ 331-338 vs WT:  $P=0.1471$ ; C $\Delta$ 320-330 vs WT:  $P=0.0734$ ; C $\Delta$ 320-338 vs WT:  $P=0.5272$ ; Q323<sup>C-term</sup>A vs WT:  $P=0.3773$ ; T324<sup>C-term</sup>A vs WT:  $P=0.2654$ ; I325<sup>C-term</sup>A vs WT:  $P=0.3266$ ; M328<sup>C-term</sup>A vs WT:  $P=0.5332$ ; K330<sup>C-term</sup>A vs WT:  $P=0.1361$ ; Y331<sup>C-term</sup>A vs WT:  $P=0.6206$ ; F332<sup>C-term</sup>A vs WT:  $P=0.1515$ ; K337<sup>C-term</sup>E vs WT:  $P=0.4299$ ), related to **Fig. 6g. g**, Surface expression of WT and mutant constructs of the seven key residues in the BRET-based assay (from left to right  $n=9, 8, 6, 6, 7, 7, 6, 6, 7$ ; R78<sup>ICL1</sup>E vs WT:  $P=0.1892$ ; M82<sup>ICL1</sup>A vs WT:  $P=0.8462$ ; F149<sup>3.58</sup>A vs WT:  $P=0.6400$ ; R152<sup>ICL2</sup>E vs WT:  $P=0.9768$ ; R157<sup>ICL2</sup>E vs WT:  $P=0.9065$ ; H248<sup>5.63</sup>A vs WT:  $P=0.3957$ ; F318<sup>7.58</sup>A vs WT:  $P=0.9565$ ; F318<sup>7.58</sup>W vs WT:  $P=0.8343$ ), related to **Fig. 6h**. All of which were measured by ELISA assay. Data are presented as the percentage of WT activity and are shown as the mean  $\pm$  SEM (bars) from at least six independent experiments performed in technical triplicates with individual data points shown (dots). ns (not significant) =  $P > 0.05$ , \* $P < 0.05$ , \*\* $P < 0.01$ , \*\*\* $P < 0.001$ , \*\*\*\* $P < 0.0001$  by two-tailed unpaired t-test compared to WT. **Supplementary Tables 3 and 4** provide detailed information. Source data are provided as a Source Data file.

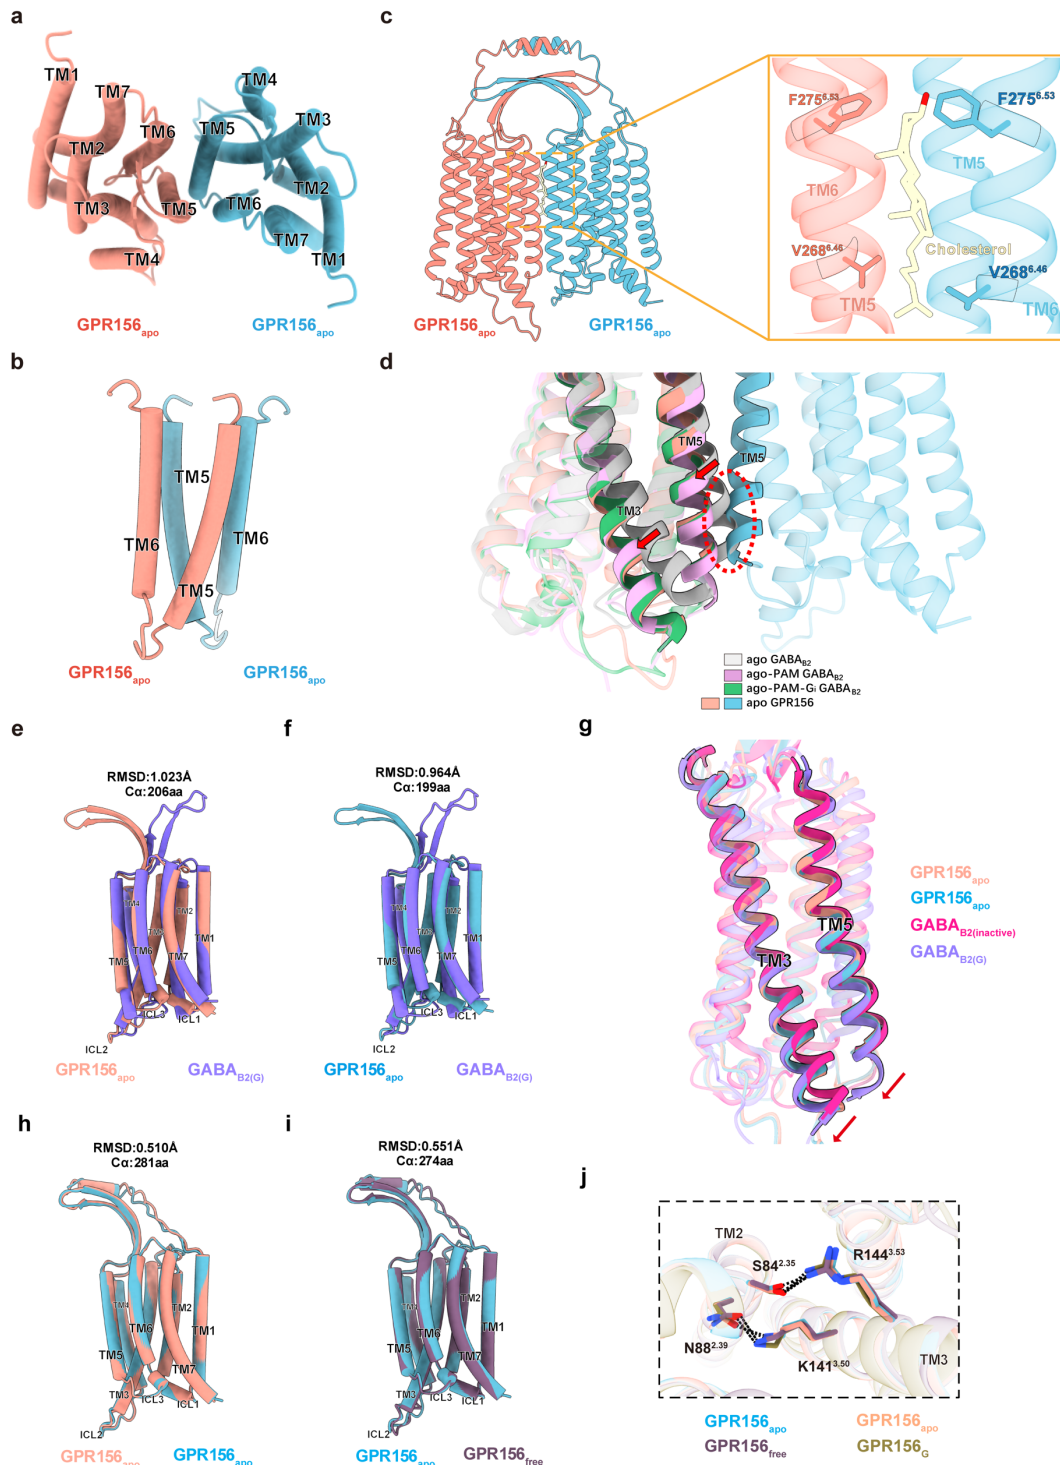

**Supplementary Fig. 8 | Conformational comparisons of apo GPR156 with other class C GPCRs.**

**a, b,** Overall arrangement of the TM5/6 domains of the GPR156 homodimer is shown as a top (**a**) and side view (**b**). **c,** The orthogonal view of the 7TM dimer interface with the cholesterol molecule in GPR156<sub>apo</sub>–GPR156<sub>apo</sub>, and detailed interactions in this region in which cholesterol mediates the interaction between TM5 and TM6 of the 7TM protomers. **d,** Structural comparisons of apo GPR156 with the agonist-bound GABA<sub>B</sub> (ago) (PDB code: 6UO9), agonist and PAM-bound GABA<sub>B</sub> (ago/PAM)

(PDB code: 6UO8), and G<sub>i</sub>-bound GABA<sub>B</sub> (ago/PAM-G<sub>i</sub>) (PDB code: 7EB2). **e, f**, Comparison of the TMD of two apo GPR156 subunits and GABA<sub>B2(G)</sub> (PDB code: 7EB2), separately (**e, f**). The RMSD levels were calculated. **g**, Side views of the superposed structures of the two GPR156<sub>apo</sub>, GABA<sub>B2(G)</sub> (PDB code: 7EB2), and GABA<sub>B2(inactive)</sub> (PDB code: 6WIV) aligned to the TMD of GABA<sub>B2(G)</sub>. TM3 and TM5 are highlighted. **h, i**, Comparison of the two protomers of apo GRP156 (**h**), apo GPR156 and the GPR156 G-free subunit (**i**). The RMSD levels were calculated. **j**, Magnified views of the detailed interactions within the TMD of each protomer from apo GPR156 and G<sub>i</sub>-bound GRP156 complex.

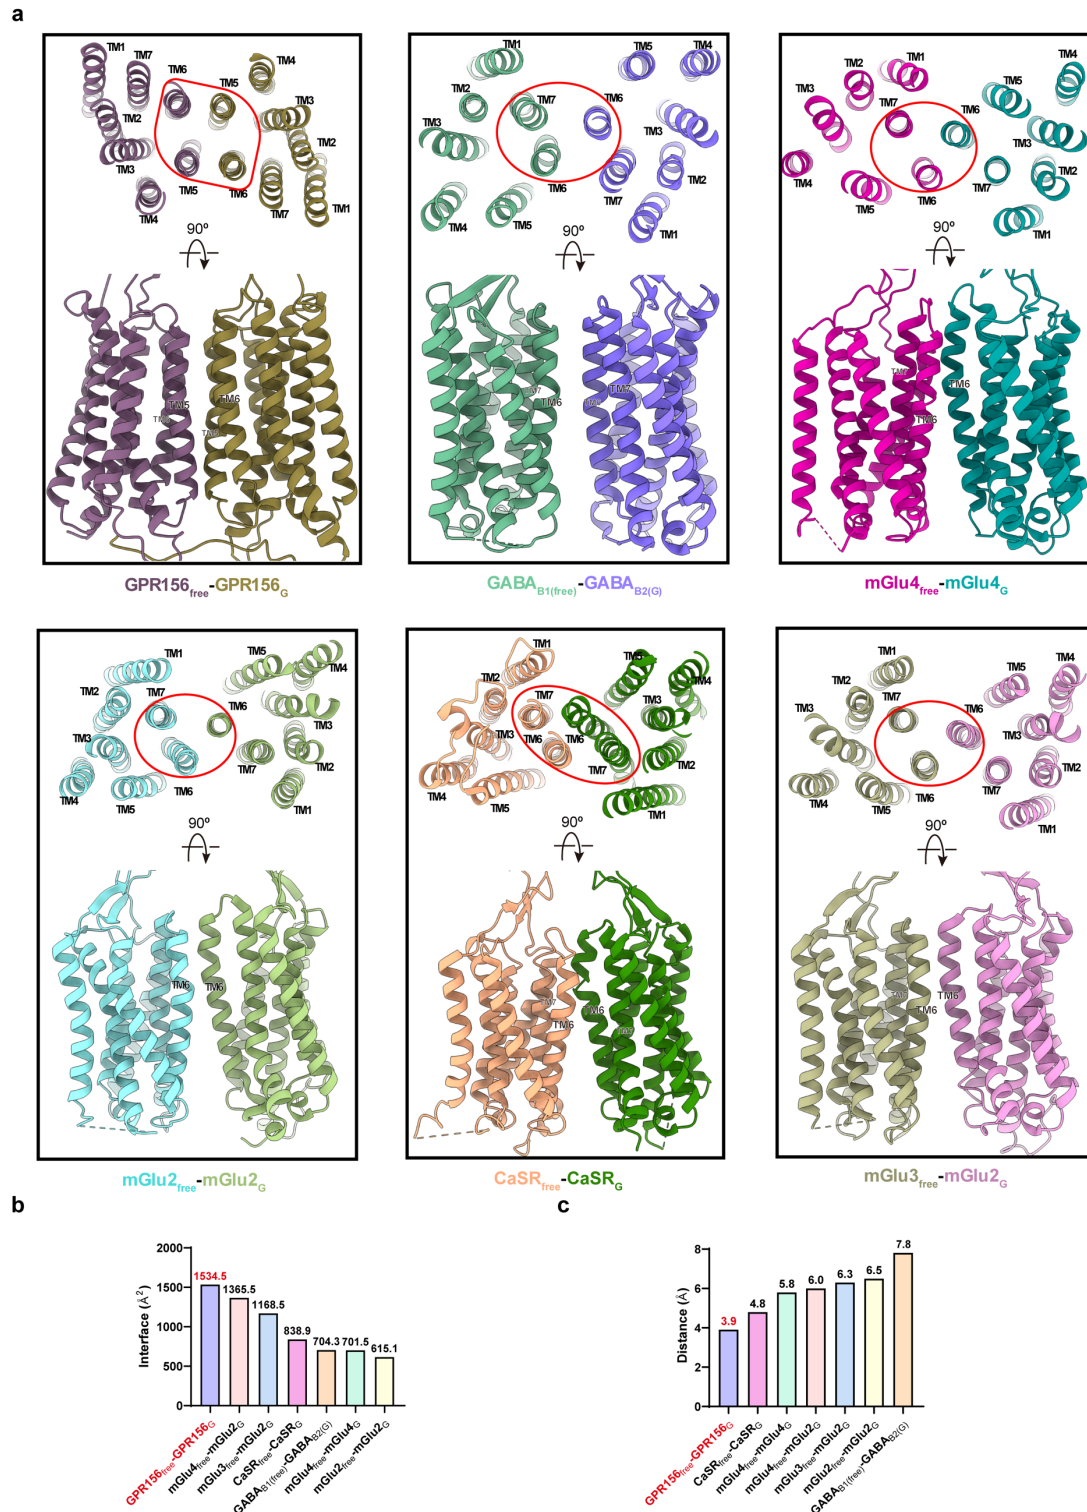

**Supplementary Fig. 9 | Comparison of the transmembrane dimer interface of GPR156 with other class C GPCR–G complexes.**

**a**, Comparison of 7TM dimerization with G protein across class C GPCRs, including GPR156, GABA<sub>B1(free)</sub>–GABA<sub>B2(G)</sub> (PDB code: 7EB2), mGlu4<sub>free</sub>–mGlu4<sub>G</sub> (PDB code: 7E9H), mGlu2<sub>free</sub>–mGlu2<sub>G</sub> (PDB code: 7MTS), CaSR<sub>free</sub>–CaSR<sub>G</sub> (PDB code: 8WPU), and mGlu3<sub>free</sub>–mGlu2<sub>G</sub> (PDB code: 8JD3). **b**, **c**, Statistical analysis of the dimeric interface area (**b**) and the distance (**c**) of class C GPCR dimers with the G protein

(including GPR156<sub>free</sub>-GPR156<sub>G</sub> (C $\alpha$  of G244-G244), CaSR<sub>free</sub>-CaSR<sub>G</sub> (C $\alpha$  of T828-A824; PDB code: 8WPU), mGlu4<sub>free</sub>-mGlu4<sub>G</sub> (C $\alpha$  of I804-I804; PDB code: 7E9H), mGlu4<sub>free</sub>-mGlu2<sub>G</sub> (C $\alpha$  of T808-V782; PDB code: 8JD5), mGlu3<sub>free</sub>-mGlu2<sub>G</sub> (C $\alpha$  of T792-V782; PDB code: 8JD3), mGlu2<sub>free</sub>-mGlu2<sub>G</sub> (C $\alpha$  of T783-V782; PDB code: 7MTS), and GABA<sub>B1</sub>(<sub>free</sub>)-GABA<sub>B2</sub>(<sub>G</sub>) (C $\alpha$  of A832-L712; PDB code: 7EB2)). Source data are provided as a Source Data file.



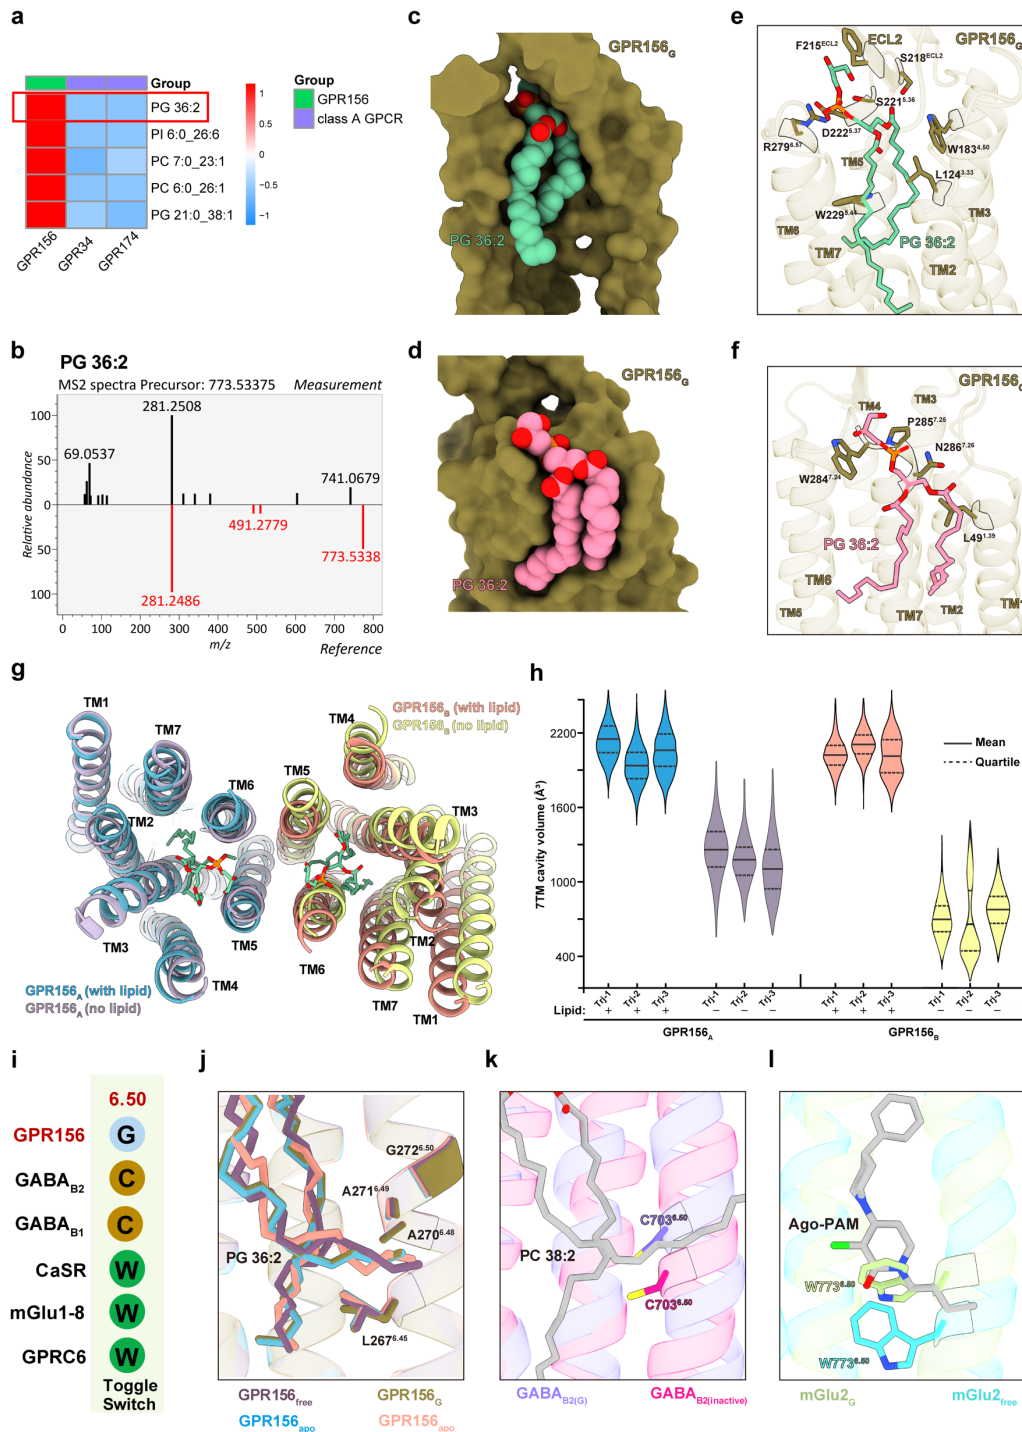

### Supplementary Fig. 10 | Identification of the endogenous lipid molecule in the structures of GPR156.

**a**, Heatmap visualization of the differential enrichment of phospholipids derived from LC-MS/MS analysis of samples from GPR156 ( $n = 3$ ) and two other class A GPCRs (GPR34 and GPR174) ( $n$  for GPR34= 2,  $n$  for GPR174= 2) that do not contain phospholipids in their known structures. Source data are provided as a Source Data file. **b**, High-resolution MS2 spectra of the peak (black) matched with standard spectra of PG 36:2 in red. **c-f**, The maps were compared (**c**, **d**), and the LC-MS/MS results led to the decision to model PG 36:2 in the pocket within the GPR156<sub>G</sub>

subunits (e) and located at the extrahelical site (f). **g**, Representative top view of the GPR156-dimer cartoon model from the three replicates of MD simulations at 300 ns. **h**, The collapse of the transmembrane cavity in the three replicates when phospholipids were removed (as assessed by the 7TM cavity volume), refer to **Supplementary Fig. 12** for details. **i**, The key residue in the toggle switch motif (6.50) was aligned among members of class C GPCRs. **j-l**, Close-up view of the conserved toggle switch motif in GPR156 (**j**) and other members of the class C subfamily, including GABA<sub>B</sub> receptor (PDB codes: 7EB2 and 6WIV) (**k**) and mGlu2 (PDB code: 7MTS) (**l**). The phospholipids of different GPR156 subunits (PG 36:2) are displayed by the color of the corresponding subunits. Phospholipids in GABA<sub>B</sub> receptor (PC 38:2) and ago-PAM in mGlu2<sub>G</sub> are marked with gray.

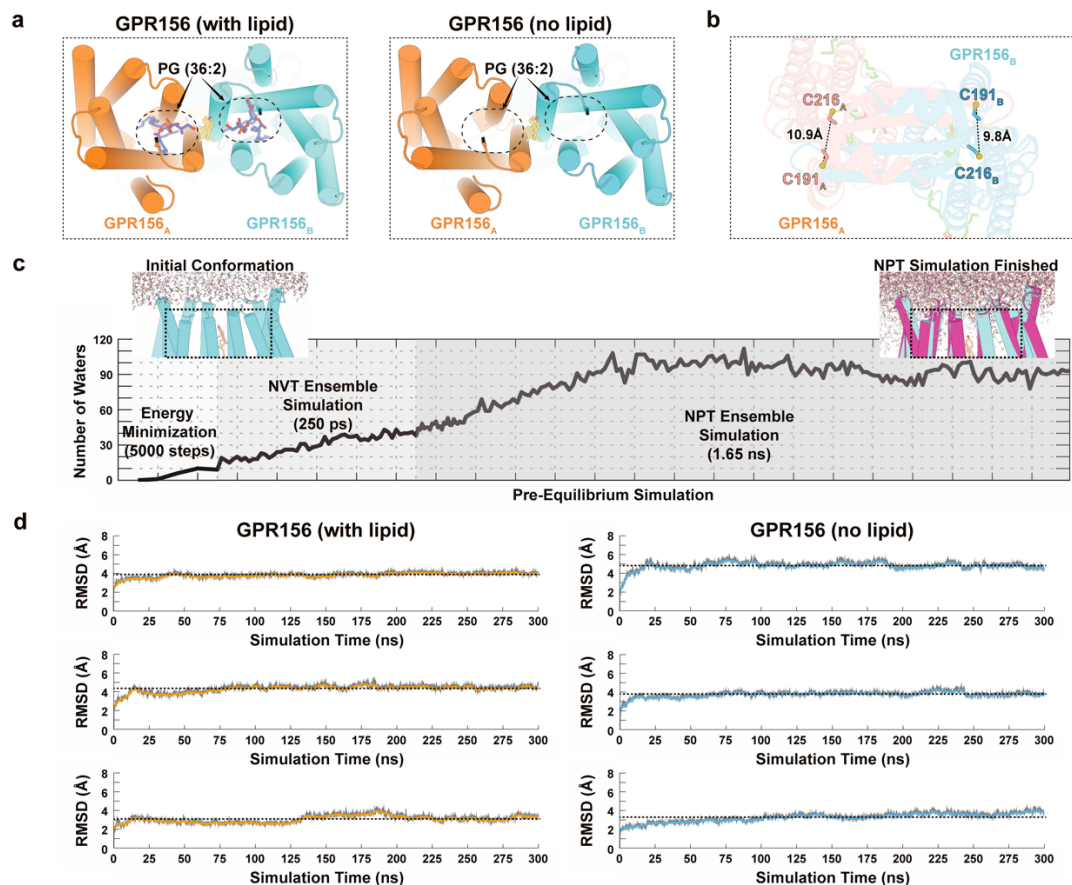

### Supplementary Fig. 11 | MD simulation details and stability evaluation.

**a**, The snapshot of the initial structure for the GPR156 (with lipid) and the GPR156 (no lipid) systems with the endogenous lipid PG (36:2) removed. **b**, The distance between sulfur atoms of C191 and C216 in the GPR156 apo structure. **c**, The number of water molecules that filled in the 7TM cavity of GPR156 (no lipid) system over the pre-equilibrium simulation. **d**, The RMSD of all heavy atoms of GPR156 over the simulation time for both the GPR156 (with lipid) and the GPR156 (no lipid) systems.

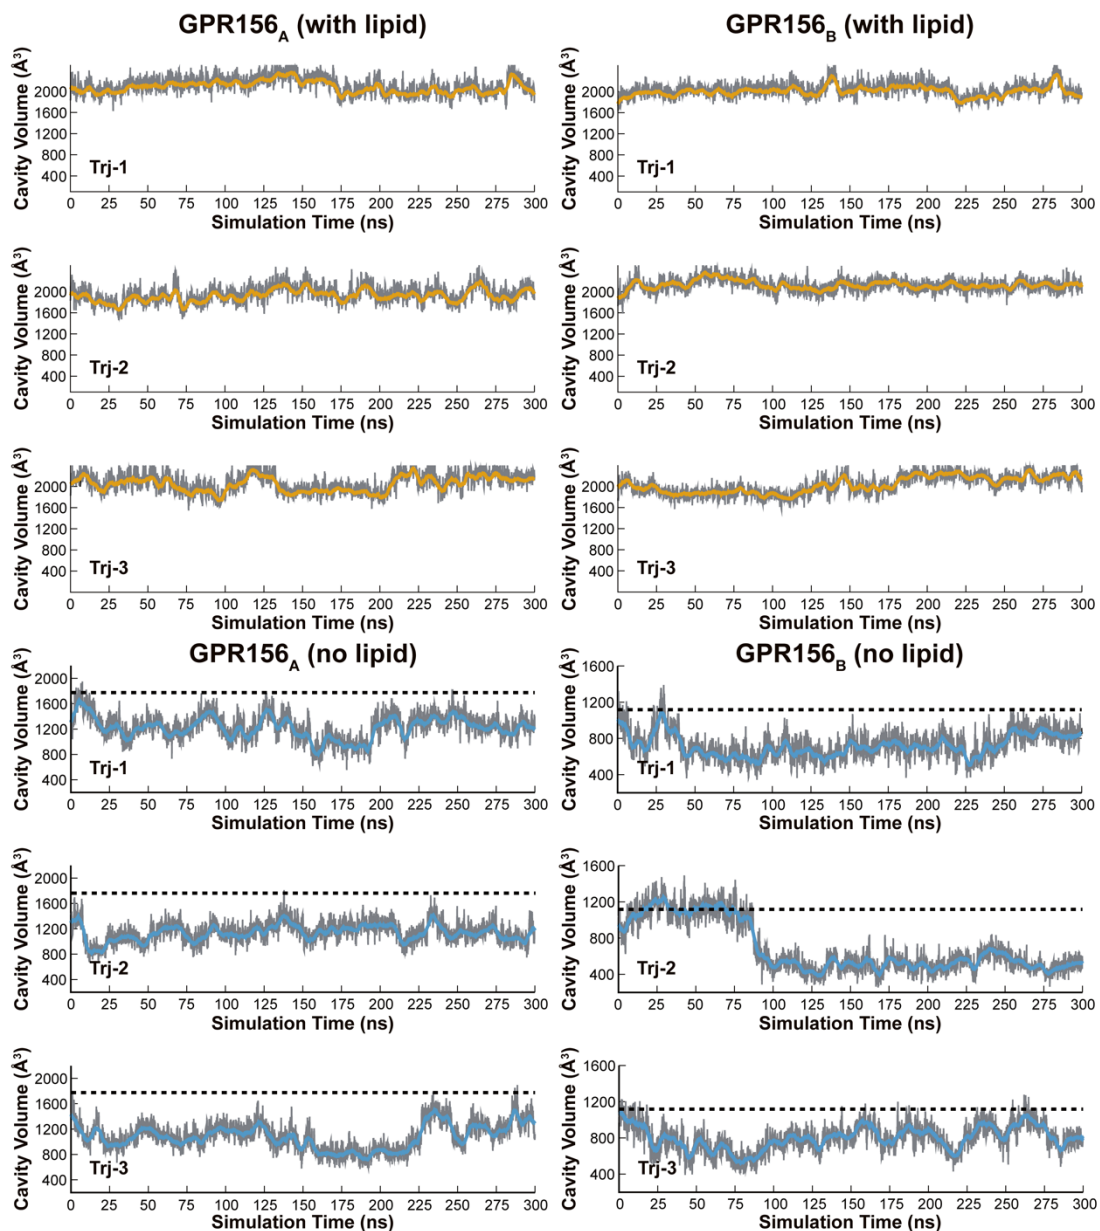

**Supplementary Fig. 12 | The volume of phospholipid-bound 7TM cavity was measured over time for individual simulations.**

The volume of phospholipid-bound 7TM cavity of chain A and chain B measured for the three independent trajectories of the GPR156 (with lipid) and the GPR156 (no lipid) systems separately.

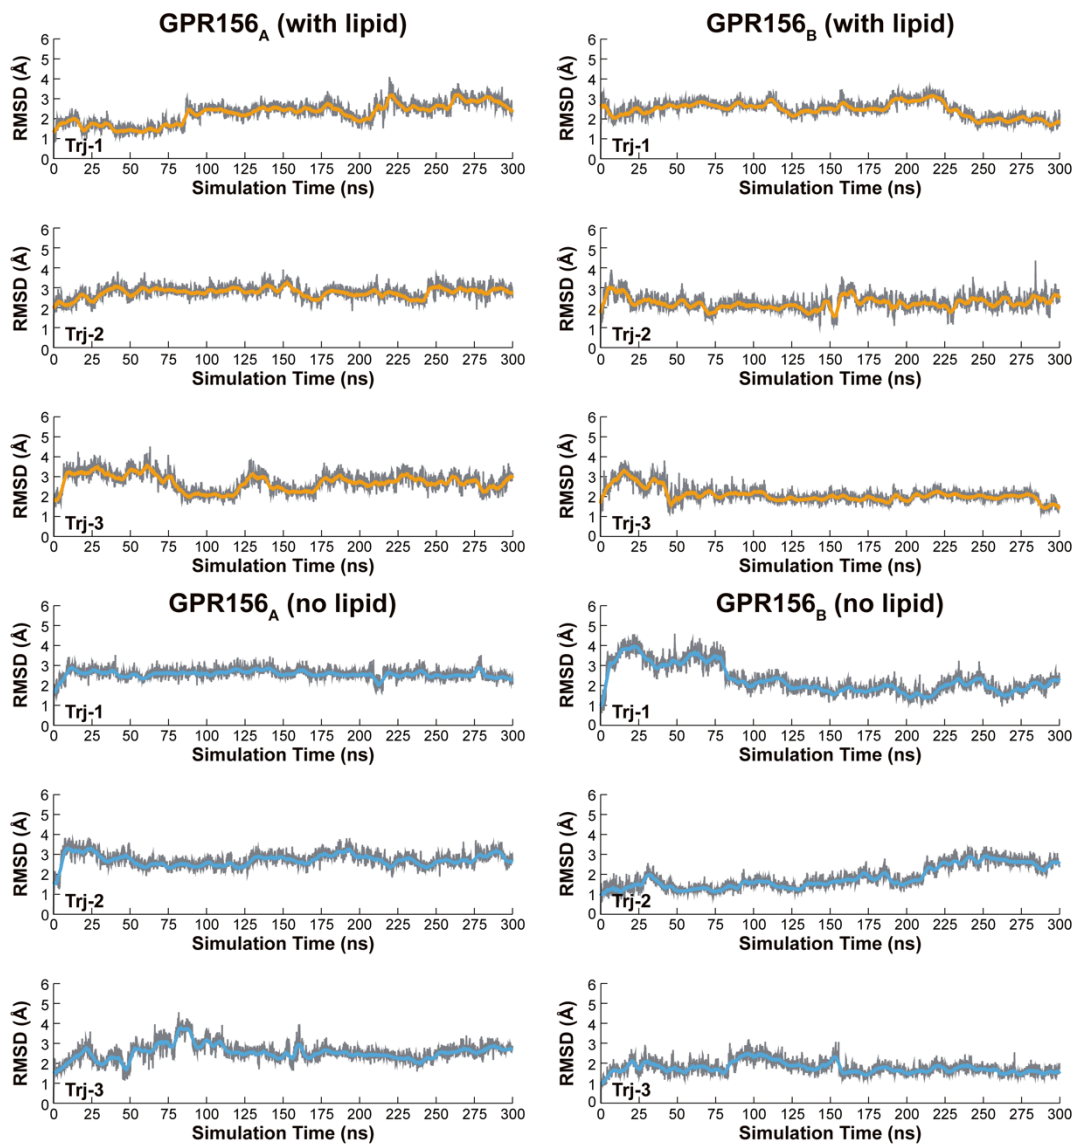

**Supplementary Fig. 13 | RMSD of TM3 helix intracellular end measured over time for individual simulations.**

The RMSD of TM3 helix intracellular end of chain A and chain B measured for the three independent trajectories of the GPR156 (with lipid) and the GPR156 (no lipid) systems separately.

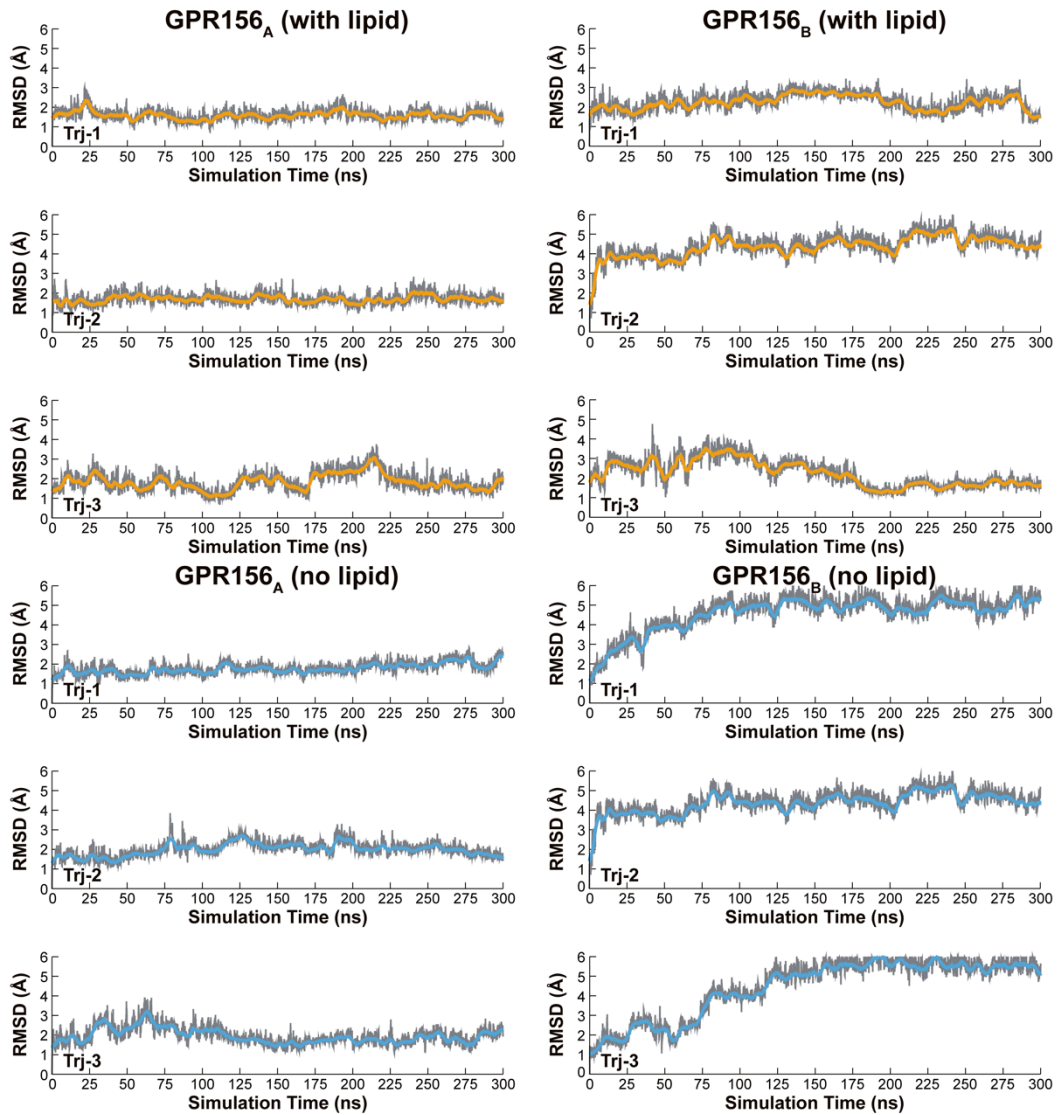

**Supplementary Fig. 14 | RMSD of TM5 helix intracellular end measured over time for individual simulations.**

The RMSD of TM5 helix intracellular end of chain A and chain B measured for the three independent trajectories of the GPR156 (with lipid) and the GPR156 (no lipid) systems separately.

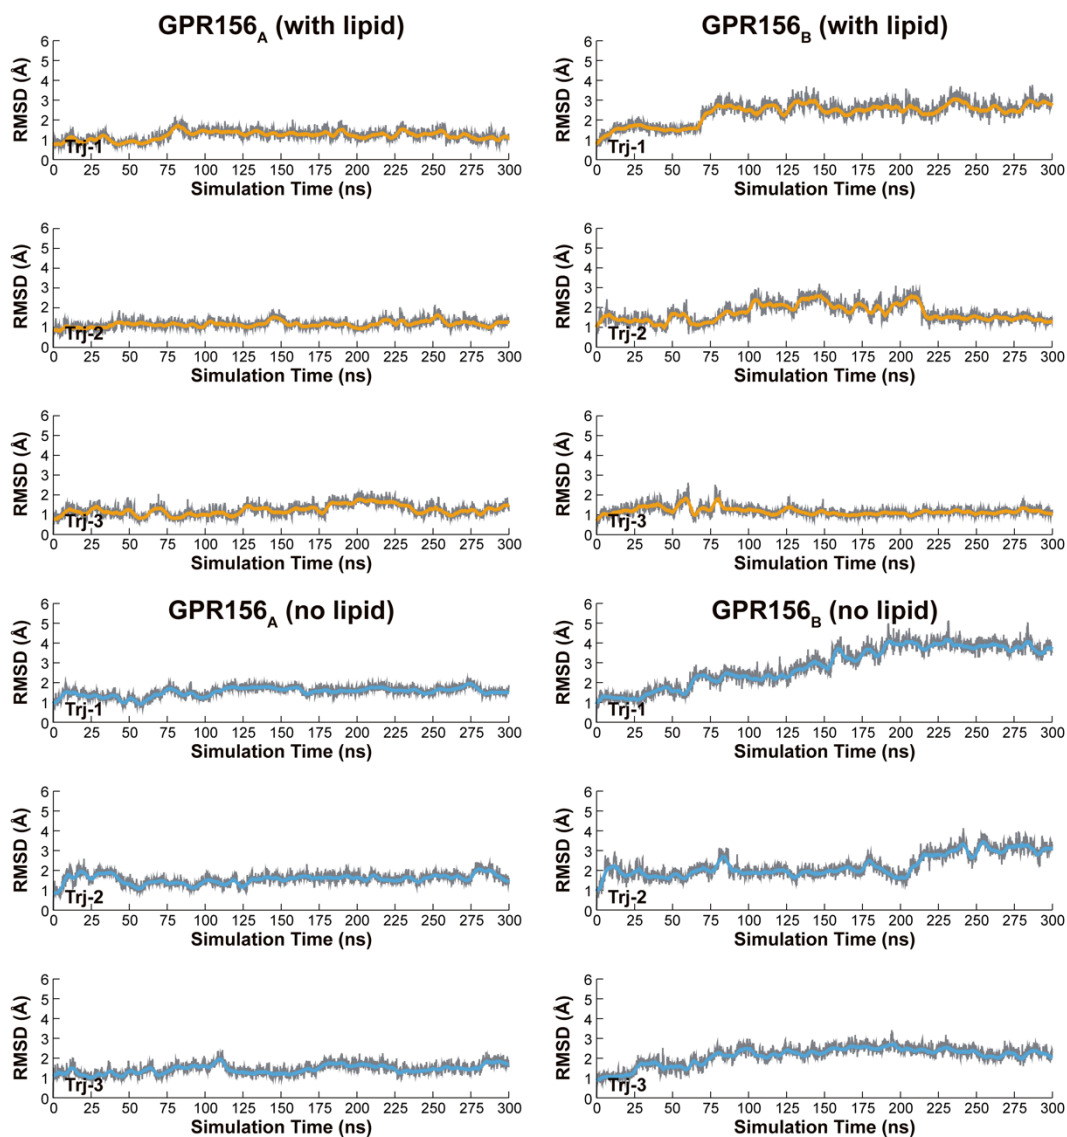

**Supplementary Fig. 15 | RMSD of TM6 helix intracellular end measured over time for individual simulations.**

The RMSD of TM6 helix intracellular end of chain A and chain B measured for the three independent trajectories of the GPR156 (with lipid) and the GPR156 (no lipid) systems separately.

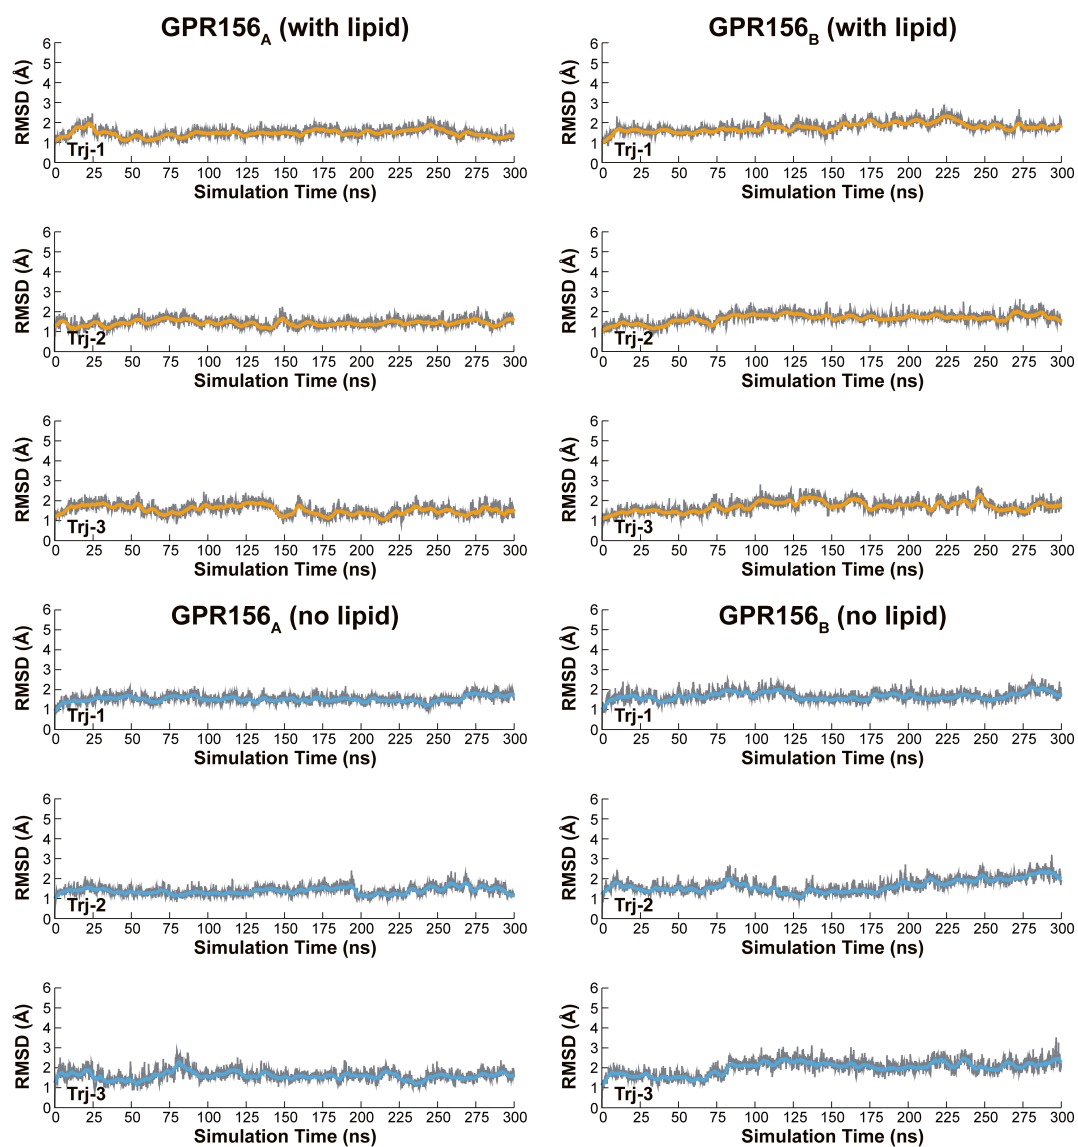

**Supplementary Fig. 16 | RMSD of TM7 helix intracellular end measured over time for individual simulations.**

The RMSD of TM7 helix intracellular end of chain A and chain B measured for the three independent trajectories of the GPR156 (with lipid) and the GPR156 (no lipid) systems separately.



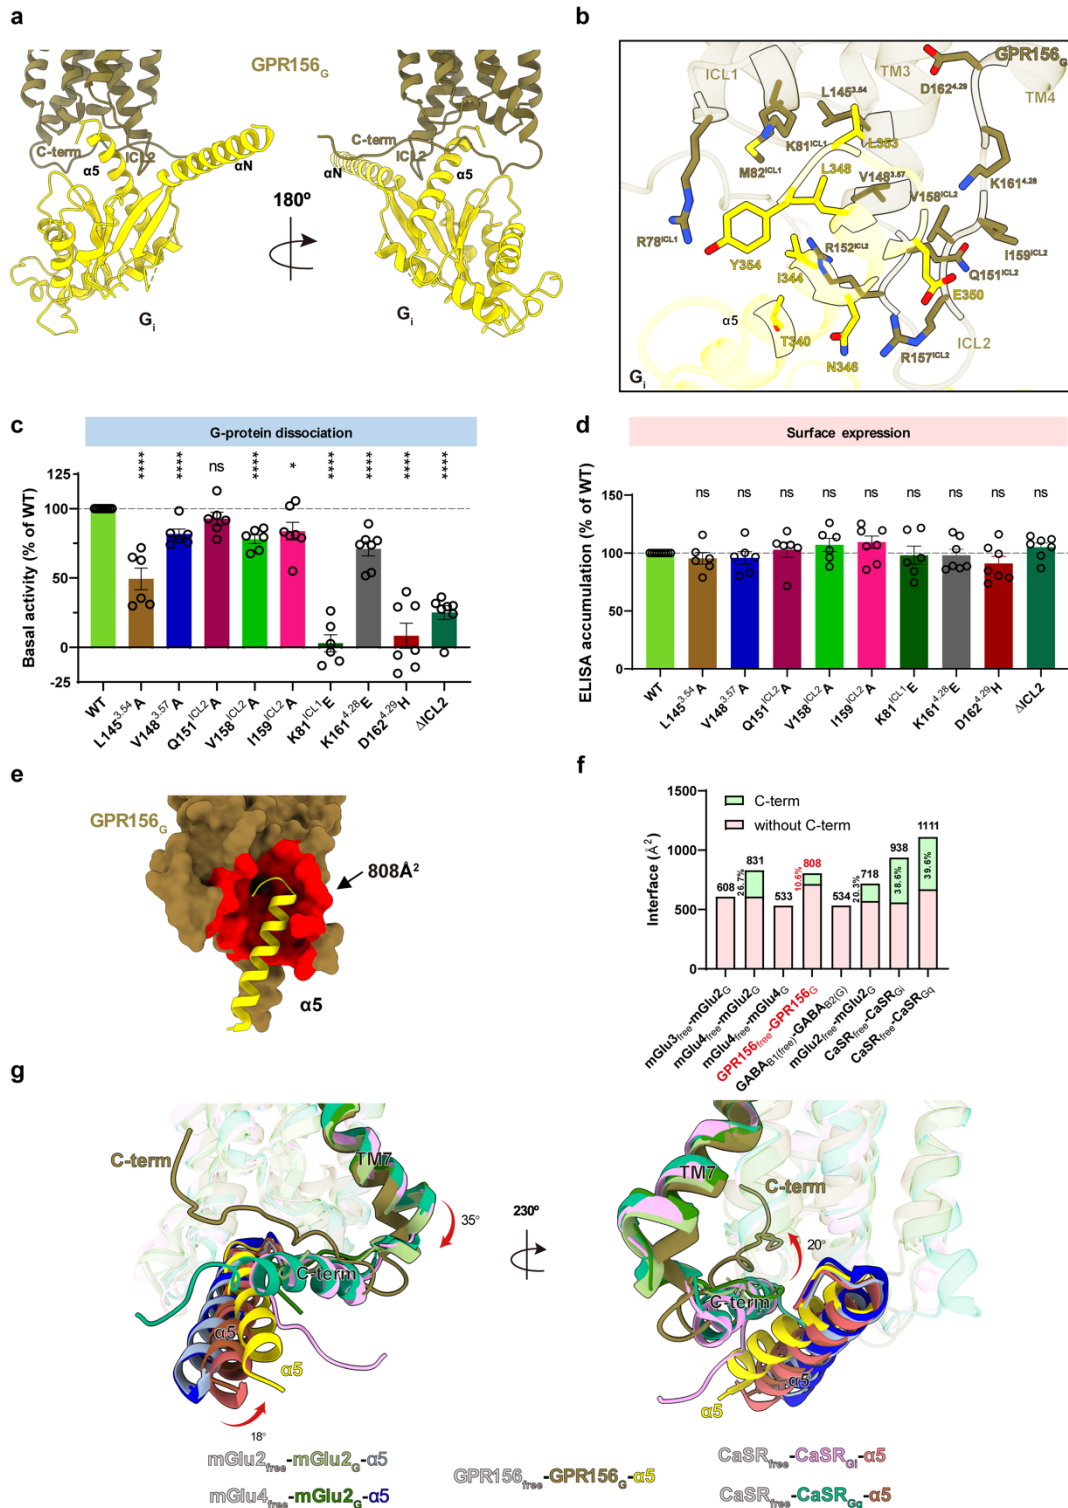

**Supplementary Fig. 17 | Comparison of the  $G_i$  binding pocket and the C-terminus conformation of GPR156 with other class C GPCRs.**

**a**, The  $G_{i3}$  binding pocket in GPR156, which is mainly formed by ICL2, ICL1, and the C-terminus of the G-bound subunit. **b**, Detailed interactions of ICL1, ICL2, TM3, and TM4 of the G-bound subunit with  $G\alpha_i$ . **c**, **d**, The basal activity (**c**) (from left to right  $n=9, 6, 6, 6, 6, 7, 6, 7, 7, 7$ ; L145<sup>3,54</sup>A vs WT:  $P=1.9367E-06$ ; V148<sup>3,57</sup>A vs WT:  $P=2.3859E-05$ ; Q151<sup>ICL2</sup>A vs WT:  $P=0.0778$ ; V158<sup>ICL2</sup>A vs WT:  $P=6.1673E-$

07; I159<sup>ICL2</sup>A vs WT:  $P=0.0108$ ; K81<sup>ICL1</sup>E vs WT:  $P=4.9575E-11$ ; K161<sup>4.28E</sup> vs WT:  $P=1.3239E-05$ ; D162<sup>4.29H</sup> vs WT:  $P=1.4577E-08$ ;  $\Delta$ ICL2 vs WT:  $P=8.0139E-11$ ) and surface expression (**d**) (from left to right  $n=9, 6, 6, 6, 6, 7, 6, 7, 7, 7$ ; L145<sup>3.54A</sup> vs WT:  $P=0.2783$ ; V148<sup>3.57A</sup> vs WT:  $P=0.3542$ ; Q151<sup>ICL2</sup>A vs WT:  $P=0.6070$ ; V158<sup>ICL2</sup>A vs WT:  $P=0.1459$ ; I159<sup>ICL2</sup>A vs WT:  $P=0.1551$ ; K81<sup>ICL1</sup>E vs WT:  $P=0.7657$ ; K161<sup>4.28E</sup> vs WT:  $P=0.6815$ ; D162<sup>4.29H</sup> vs WT:  $P=0.1082$ ;  $\Delta$ ICL2 vs WT:  $P=0.1376$ ) of WT and mutant versions in the G<sub>i</sub> binding pocket of GPR156, as measured by the BRET-based assay and ELISA assay, respectively. Data are presented as the percentage of WT activity and are shown as the mean  $\pm$  SEM (bars) from at least six independent experiments performed in technical triplicate with individual data points shown (dots). ns (not significant) =  $P > 0.05$ , \* $P < 0.05$ , \*\* $P < 0.01$ , \*\*\* $P < 0.001$ , \*\*\*\* $P < 0.0001$  by two-tailed unpaired t-test compared to WT. **Supplementary Table 3** provides detailed information. **e**, Interface of GPR156 and the G<sub>13</sub> protein. The interaction interface between GPR156 and  $\alpha 5$  of G $\alpha_i$  is in red. Source data are provided as a Source Data file. **f**, Statistical diagram of the G-protein interaction area of class C GPCR dimers. The C-terminus's contribution is shown in green. Source data are provided as a Source Data file. **g**, Comparisons of the C-terminus and the  $\alpha 5$  of G $\alpha_i$  between the GPR156 and mGlu2<sub>free</sub>-mGlu2<sub>G</sub> (PDB code: 7MTS), mGlu4<sub>free</sub>-mGlu2<sub>G</sub> (PDB code: 8JD5), CaSR<sub>free</sub>-CaSR<sub>Gi</sub> (PDB code: 8SZH), and CaSR<sub>free</sub>-CaSR<sub>Gq</sub> (PDB code: 8SZG). The four structures were aligned by the G-bound subunit of the GPR156 TMD as the reference.

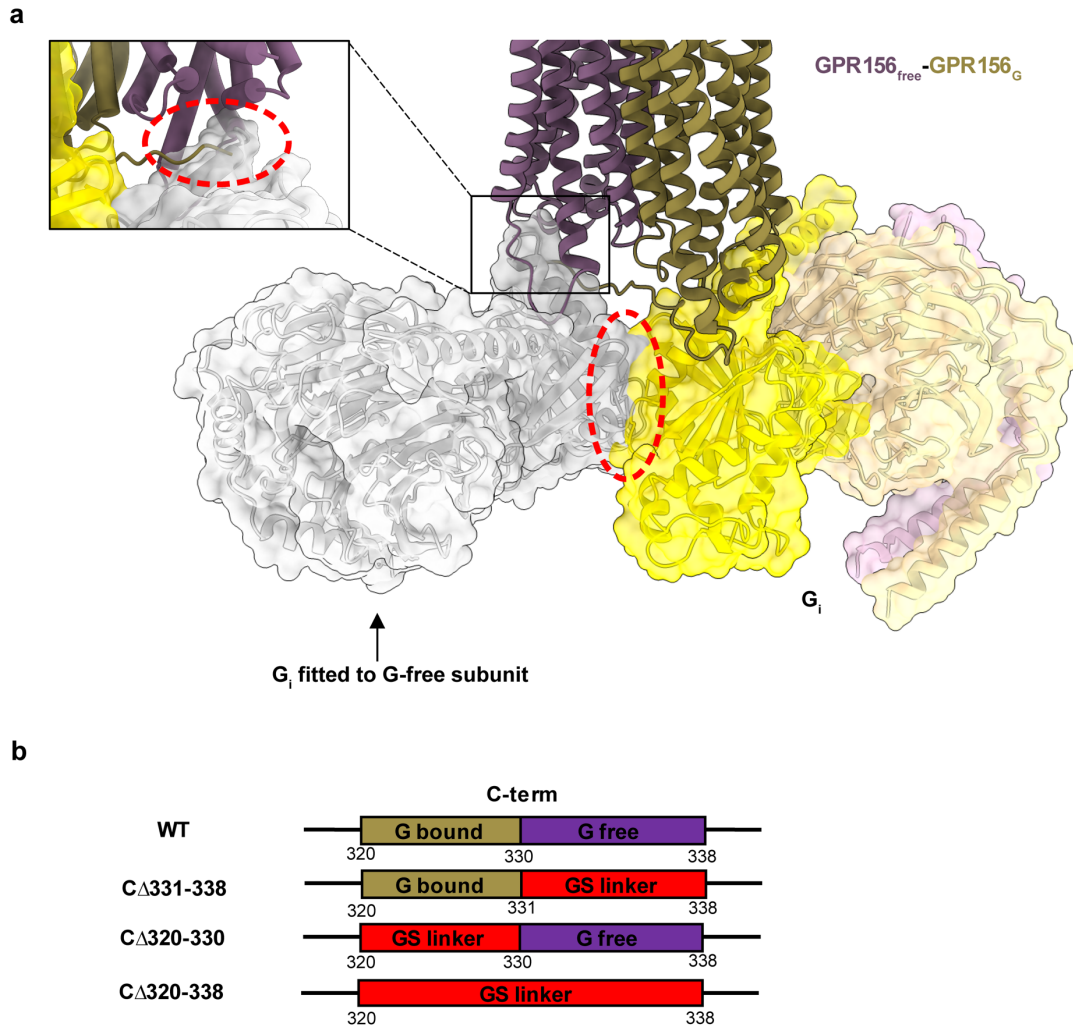

**Supplementary Fig. 18 | Diagram illustrating steric hindrance when simultaneous coupling to two G proteins and the design of the C-terminal truncation constructs.**

**a**, Two kinds of steric hindrance prevent both GPR156 protomers from being activated by the  $G_i$ -protein heterotrimer. **b**, Diagram of WT GPR156's C-terminus compared to the mutant constructs that were substituted with a GS link (C $\Delta$ 331–338, C $\Delta$ 320–330, and C $\Delta$ 320–338). GS link: A linker composed of glycine and serine.

**Supplementary Table 1 | Basal activity of the primary structure (FL) and the purification construct (EM) of GPR156, as measured by BRET and ELISA accumulation assay.**

| Mutants | $\Delta$ BRET |                |          | Expression |                |
|---------|---------------|----------------|----------|------------|----------------|
|         | % of FL       | <i>P</i> value | <i>n</i> | % of FL    | <i>P</i> value |
| FL      | 100           | /              | 6        | 100        | /              |
| EM      | 94.69±3.06    | 0.1131         | 6        | 94.41±3.26 | 0.1173         |

Data are mean ± SEM from at least six independent experiments. ns (not significant) =  $P > 0.05$ , \* $P < 0.05$ , \*\* $P < 0.01$ , \*\*\* $P < 0.001$ , \*\*\*\* $P < 0.0001$  by two-tailed unpaired t-test compared to the response of wild type.

**Supplementary Table 2 | Cryo-EM data collection, refinement, and validation statistics.**

|                                                     | apo GPR156   | GPR156-G <sub>i3</sub> complex |
|-----------------------------------------------------|--------------|--------------------------------|
| <b>Data collection and processing</b>               |              |                                |
| Magnification                                       | 150,540      | 150,540                        |
| Voltage (kV)                                        | 300          | 300                            |
| Electron exposure (e <sup>-</sup> /Å <sup>2</sup> ) | 52           | 52                             |
| Defocus range (μm)                                  | -1.0 ~ -2.5  | -1.0 ~ -2.5                    |
| Pixel size (Å)                                      | 0.93         | 0.93                           |
| Symmetry imposed                                    | C2           | C1                             |
| Initial particle projections (no.)                  | 17,010,572   | 12,058,641                     |
| Final particle projections (no.)                    | 329,646      | 1,153,971                      |
| Map resolution (Å)                                  | 3.09         | 2.39                           |
| FSC threshold                                       | 0.143        | 0.143                          |
| Map resolution range (Å)                            | 2.0-5.0      | 2.0-3.0                        |
| <b>Refinement</b>                                   |              |                                |
| Initial model used                                  | AlphaFold2   | AlphaFold2 & 7E9H              |
| Model resolution (Å)                                | 3.5          | 3.3                            |
| FSC threshold                                       | 0.5          | 0.5                            |
| Model resolution range (Å)                          | 1.5-3.5      | 2.0-3.3                        |
| Map sharpening <i>B</i> factor (Å <sup>2</sup> )    | DeepEMhancer | DeepEMhancer                   |
| Model composition                                   |              |                                |
| Non-hydrogen atoms                                  | 4,946        | 9,831                          |
| Protein residues                                    | 596          | 1232                           |
| <i>B</i> factors (Å <sup>2</sup> )                  |              |                                |
| Protein                                             | 56.72        | 113.73                         |
| Ligand                                              | 34.29        | 48.52                          |
| R.m.s. deviations                                   |              |                                |
| Bond lengths (Å)                                    | 0.021        | 0.018                          |
| Bond angles (°)                                     | 0.879        | 0.947                          |
| Validation                                          |              |                                |
| MolProbity score                                    | 2.02         | 2.03                           |
| Clashscore                                          | 15.46        | 16.17                          |
| Rotamer outliers (%)                                | 0.00         | 0.00                           |
| Ramachandran plot                                   |              |                                |
| Favored (%)                                         | 95.27        | 95.40                          |
| Allowed (%)                                         | 4.73         | 4.60                           |
| Disallowed (%)                                      | 0.00         | 0.00                           |

**Supplementary Table 3 | Basal activity of wild-type GPR156 and mutants, as measured by the BRET and ELISA accumulation assays.**

|                                         | Mutants                  | $\Delta$ BRET |                |            | Expression |                |
|-----------------------------------------|--------------------------|---------------|----------------|------------|------------|----------------|
|                                         |                          | % of WT       | <i>P</i> value | <i>n</i>   | % of WT    | <i>P</i> value |
|                                         | WT                       | 100           | /              | 12         | 100        | /              |
| Extracellular region                    | NΔ23-44                  | 110.6±3.71    | 0.0170         | 6          | 99.87±5.68 | 0.9823         |
|                                         | Δ192-213                 | 91.88±4.76    | 0.1190         | 6          | 100.2±4.89 | 0.9619         |
|                                         | Δ192-202                 | 98.77±4.60    | 0.7947         | 6          | 103.4±4.94 | 0.5129         |
| Active state feature                    | K141 <sup>3.50</sup> E   | 45.36±3.49    | 3.9825E-11     | 6          | 94.80±3.67 | 0.1761         |
|                                         | R144 <sup>3.53</sup> E   | 19.45±6.00    | 8.9060E-12     | 11         | 103.0±3.76 | 0.4340         |
|                                         | S84 <sup>2.35</sup> A    | 89.83±3.40    | 0.0086         | 6          | 102.1±3.61 | 0.5774         |
|                                         | N88 <sup>2.39</sup> A    | 100.4±3.45    | 0.9080         | 7          | 99.71±4.84 | 0.9523         |
|                                         | F135 <sup>3.44</sup> W   | 70.56±3.35    | 1.5807E-07     | 6          | 100.3±4.11 | 0.9509         |
| G <sub>i3</sub> binding pocket          | L145 <sup>3.54</sup> A   | 49.32±6.25    | 1.9367E-06     | 6          | 95.45±4.02 | 0.2783         |
|                                         | V148 <sup>3.57</sup> A   | 81.65±2.87    | 2.3859E-05     | 6          | 95.76±4.42 | 0.3542         |
|                                         | Q151 <sup>ICL2</sup> A   | 92.71±3.81    | 0.0778         | 6          | 102.8±5.26 | 0.6070         |
|                                         | V158 <sup>ICL2</sup> A   | 77.92±2.46    | 6.1673E-07     | 6          | 107.0±4.55 | 0.1459         |
|                                         | I159 <sup>ICL2</sup> A   | 83.79±5.52    | 0.0108         | 7          | 107.5±4.98 | 0.1551         |
|                                         | K81 <sup>ICL1</sup> E    | 2.90±4.96     | 4.9575E-11     | 6          | 98.10±6.25 | 0.7657         |
|                                         | K161 <sup>4.28</sup> E   | 71.01±4.44    | 1.3239E-05     | 7          | 98.08±4.57 | 0.6815         |
|                                         | D162 <sup>4.29</sup> H   | 8.335±7.91    | 1.4577E-08     | 7          | 91.08±5.20 | 0.1082         |
| ΔICL2                                   | 25.06±4.35               | 8.0139E-11    | 7              | 105.0±3.18 | 0.1376     |                |
| Dimer interface I                       | D222 <sup>5.37</sup> A   | 74.25±3.10    | 2.5282E-06     | 6          | 97.83±4.87 | 0.6641         |
|                                         | R279 <sup>6.57</sup> A   | 103.3±5.62    | 0.5694         | 7          | 98.72±5.35 | 0.8154         |
|                                         | Y280 <sup>6.58</sup> A   | 90.97±4.34    | 0.0560         | 8          | 98.74±3.33 | 0.7103         |
|                                         | V276 <sup>6.54</sup> A   | 85.32±5.07    | 0.0118         | 8          | 96.78±5.38 | 0.5593         |
|                                         | V223 <sup>5.38</sup> A   | 73.20±6.13    | 0.0006         | 8          | 94.42±3.33 | 0.1163         |
| Dimer interface II                      | L237 <sup>5.52</sup> A   | 61.19±3.26    | 5.2657E-08     | 6          | 96.35±6.36 | 0.5763         |
|                                         | V264 <sup>6.42</sup> A   | 81.27±4.60    | 0.0015         | 6          | 103.2±2.92 | 0.2896         |
|                                         | V268 <sup>6.46</sup> A   | 85.63±5.99    | 0.0309         | 8          | 106.2±5.96 | 0.3137         |
|                                         | M261 <sup>6.39</sup> A   | 70.81±2.88    | 3.1286E-07     | 6          | 99.82±5.13 | 0.9733         |
|                                         | Y241 <sup>5.56</sup> A   | 78.48±5.21    | 0.0014         | 6          | 97.26±5.20 | 0.6069         |
|                                         | L234 <sup>5.49</sup> A   | 72.43±3.64    | 6.6258E-06     | 6          | 91.78±4.01 | 0.0625         |
| C-terminal tail                         | CΔ331-338                | 58.70±3.38    | 7.4009E-09     | 7          | 105.9±3.85 | 0.1471         |
|                                         | CΔ320-330                | 20.00±7.24    | 5.5541E-08     | 6          | 95.82±2.16 | 0.0734         |
|                                         | CΔ320-338                | 14.63±6.73    | 4.6108E-09     | 7          | 101.4±2.09 | 0.5272         |
|                                         | Q323 <sup>C-term</sup> A | 32.67±4.92    | 4.2212E-09     | 6          | 97.74±2.48 | 0.3773         |
|                                         | T324 <sup>C-term</sup> A | 119.7±5.00    | 0.0017         | 6          | 102.1±1.84 | 0.2654         |
|                                         | I325 <sup>C-term</sup> A | 108.1±3.70    | 0.0470         | 6          | 103.4±3.34 | 0.3266         |
|                                         | M328 <sup>C-term</sup> A | 76.06±5.00    | 0.0002         | 9          | 97.64±3.71 | 0.5332         |
|                                         | K330 <sup>C-term</sup> A | 65.01±3.90    | 3.4903E-07     | 7          | 92.95±4.48 | 0.1361         |
|                                         | Y331 <sup>C-term</sup> A | 68.75±3.13    | 1.8316E-07     | 6          | 98.45±3.06 | 0.6206         |
|                                         | F332 <sup>C-term</sup> A | 73.21±5.29    | 0.0001         | 8          | 96.31±2.45 | 0.1515         |
| K337 <sup>C-term</sup> E                | 66.96±3.12               | 9.1879E-08    | 6              | 97.87±2.62 | 0.4299     |                |
| Key residues related to C-terminal tail | R78 <sup>ICL1</sup> E    | 46.25±3.74    | 3.5544E-10     | 8          | 95.12±3.55 | 0.1892         |
|                                         | M82 <sup>ICL1</sup> A    | 68.15±3.23    | 2.1033E-07     | 6          | 100.8±4.23 | 0.8462         |
|                                         | F149 <sup>3.58</sup> A   | 9.62±4.53     | 3.9032E-11     | 6          | 98.18±3.80 | 0.6400         |
|                                         | R152 <sup>ICL2</sup> E   | 67.05±2.84    | 1.4385E-08     | 7          | 100.1±4.12 | 0.9768         |
|                                         | R157 <sup>ICL2</sup> E   | 27.21±7.12    | 7.0588E-08     | 7          | 99.38±5.17 | 0.9065         |
|                                         | H248 <sup>5.63</sup> A   | 64.24±3.80    | 3.5652E-07     | 6          | 96.68±3.78 | 0.3957         |
|                                         | F318 <sup>7.58</sup> A   | 76.02±3.43    | 9.5730E-06     | 6          | 100.2±3.23 | 0.9565         |
|                                         | F318 <sup>7.58</sup> W   | 73.22±2.97    | 3.2740E-07     | 7          | 99.43±2.69 | 0.8343         |

Data are mean ± SEM from at least six independent experiments. ns (not significant) =  $P > 0.05$ , \* $P < 0.05$ , \*\* $P < 0.01$ , \*\*\* $P < 0.001$ , \*\*\*\* $P < 0.0001$  by two-tailed unpaired t-test compared to the response of wild type.

**Supplementary Table 4 | Basal activity of wild-type GPR156 and mutants, as measured by the NanoBiT and ELISA accumulation assays.**

| Mutants              | NanoBiT accumulation |                |            | Expression |                |        |
|----------------------|----------------------|----------------|------------|------------|----------------|--------|
|                      | % of WT              | <i>P</i> value | <i>n</i>   | % of WT    | <i>P</i> value |        |
| WT                   | 100                  | /              | 7          | 100        | /              |        |
| C-terminal tail      | CΔ331-338            | 64.50±5.35     | 2.4064E-05 | 7          | 110.2±4.70     | 0.0505 |
|                      | CΔ320-330            | 54.77±4.32     | 2.1818E-07 | 7          | 99.68±6.04     | 0.9590 |
|                      | CΔ320-338            | 38.52±5.47     | 9.9574E-08 | 7          | 100.3±4.57     | 0.9474 |
| Extracellular region | Δ192-213             | 93.78±4.36     | 0.1819     | 6          | 95.11±3.08     | 0.1402 |
|                      | Δ192-202             | 99.04±5.74     | 0.8694     | 7          | 98.65±5.66     | 0.8155 |
|                      | NΔ23-44              | 107.5±4.20     | 0.1038     | 6          | 103.0±2.39     | 0.2373 |

Data are mean ± SEM from at least six independent experiments. ns (not significant) =  $P > 0.05$ ,  $*P < 0.05$ ,  $**P < 0.01$ ,  $***P < 0.001$ ,  $****P < 0.0001$  by two-tailed unpaired t-test compared to the response of wild type.

**Supplementary Table 5 | Details of the all-atomistic molecular dynamic simulations.**

| System Name                               |                 | GPR156 (with lipid)            | GPR156 (no lipid)              |
|-------------------------------------------|-----------------|--------------------------------|--------------------------------|
| System size                               |                 | 13.4×13.4×13.1 nm <sup>3</sup> | 13.4×13.4×13.1 nm <sup>3</sup> |
| Number of lipids<br>(From apo structure)  | PG (36:2)       | 4                              | 2                              |
|                                           | Cholesterol     | 1                              | 1                              |
| Number of lipids<br>(Added by CHARMM-GUI) | POPC            | 180                            | 180                            |
|                                           | POPE            | 60                             | 60                             |
|                                           | Cholesterol     | 7                              | 7                              |
| Number of Waters                          |                 | 49,631                         | 49,612                         |
| Ions                                      | Na <sup>+</sup> | 135                            | 134                            |
|                                           | Cl <sup>-</sup> | 154                            | 155                            |



**Supplementary Table 6 | RMSD of the transmembrane helix ends in the intracellular side.**

| <b>RMSD of TM Helix Ends (Å)</b> | <b>GPR156<sub>A</sub></b> |                 | <b>GPR156<sub>B</sub></b> |                 |
|----------------------------------|---------------------------|-----------------|---------------------------|-----------------|
|                                  | <b>With lipid</b>         | <b>No lipid</b> | <b>With lipid</b>         | <b>No lipid</b> |
| <b>TM3</b>                       | 2.62 ± 0.45               | 2.65 ± 0.36     | 2.29 ± 0.40               | 2.02 ± 0.56     |
| <b>TM5</b>                       | 1.73 ± 0.35               | 1.94 ± 0.38     | 2.43 ± 0.62               | 4.51 ± 0.69     |
| <b>TM6</b>                       | 1.22 ± 0.26               | 1.53 ± 0.27     | 1.78 ± 0.42               | 2.44 ± 0.70     |
| <b>TM7</b>                       | 1.50 ± 0.24               | 1.53 ± 0.24     | 1.74 ± 0.28               | 1.80 ± 0.33     |

**Supplementary Fig. 2d**

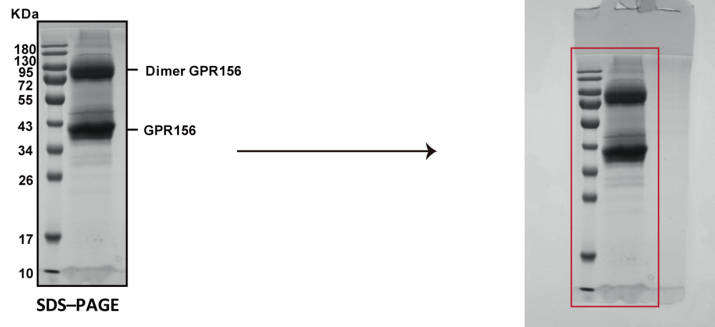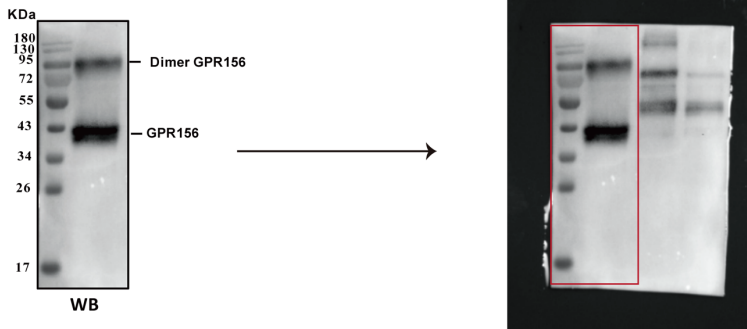

**Supplementary Fig. 2e**

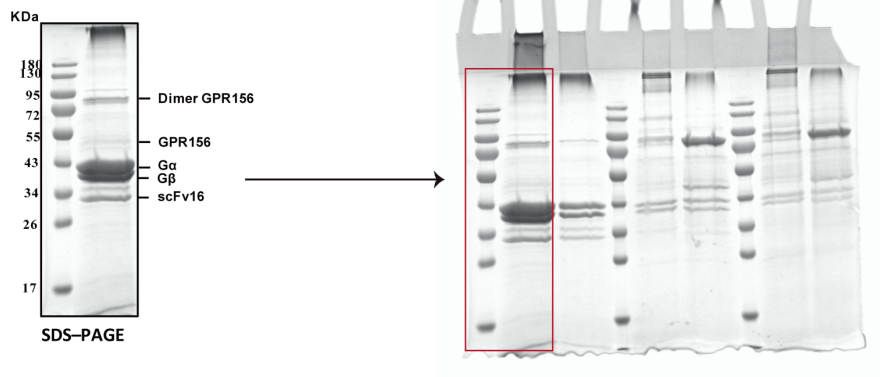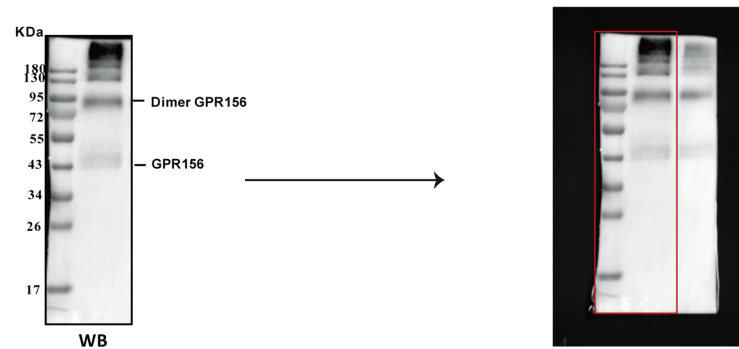

**Unprocessed gels and western blots for Supplementary Fig. 2d and e. Cropped regions are indicated as red boxes.**
