# Supplementary material for: Molecular insights into the activation mechanism of GPR156 in maintaining auditory function
Source: PubMed Central journal article supplement — Nat Commun. 2024 Dec 5;15:10601. doi: 10.1038/s41467-024-54681-5 (PMC11621567; doi:10.1038/s41467-024-54681-5), 2024-12-05
Supplement: 41467_2024_54681_MOESM2_ESM.pdf [file 41467_2024_54681_MOESM2_ESM.pdf]

## **Description of Additional Supplementary Files**

File name: Supplementary Data 1

Description: Phospholipid molecules in the LC-MS/MS source data.
